# Supplementary material
Source: publisher figshare collection journal article supplement (https://frontiersin.figshare.com/ndownloader/files/22137813)
Supplement: Supplementary file [file 22137813]

## Supplemental Methods

### Histological analyses of atherosclerosis progression and calcification

Mice were perfused *in situ* after anesthesia with 1X PBS by inserting a 20-gauge hypodermic needle with an IV line attached to lactated ringers into the heart left apex. A nick was made in the right atrium to allow perfusate to flow by physiological pressure. After 15 minutes, 4% Paraformaldehyde (PFA) was used to fix-perfuse until the liver was pale in color (approximately 15 minutes). For harvest of fresh, non-fixed tissue, only cold PBS was used for the perfusions. When necessary, tissues were further fixed by submersion in 10% formalin. Hearts were mounted in paraffin or flash frozen in OCT for sectioning and 8-10  $\mu$ m sections were collected of the aortic sinus.

### Polarized light microscopy

Images of picrosirius red staining under polarized light were acquired as previously described[33] using an Olympus BX51 microscope with an Olympus DP73 camera. The collagen type I (yellow-red birefringence) and III (green birefringence) signals were quantified on HALO platform (Indica Labs, Corrales, NM).

### Mouse bone marrow isolation, culture and treatments

Bone marrow cells were flushed from femurs and tibias with cold PBS. Cell suspensions were grown for 6-7 days in DMEM, 10% FBS, and 50 ng/ml MCSF (PeproTech, Rocky Hills, NJ).

### TaqMan Gene Expression Assay probes:

**Mouse:** *Trem14* (Mm00553947\_m1), *Cd36* (AssayID: Mm00432403\_m1) and *Gapdh* (AssayID: Mm99999915\_g1).

**Human:** *HPRT* (Hs02800695\_m1), *MRC1* (Hs00267207\_m1), *TNF* (Hs00174128\_m1) and *IRG1* (*ACOD1*) (Hs00985781\_m1).

### Serum cholesterol analysis

After overnight fasting, blood was collected into serum separator tubes and saved at -80 °C for further analysis. Cholesterol levels were measured using the Cholesterol-E colorimetric kit (Wako Diagnostics, Richmond, VA) according to manufacturer's instructions.

*Trem14* promotes inflammatory programs in human and murine macrophages and alters atherosclerosis lesion composition in the Apolipoprotein E deficient mouse

### Serum cytokine analysis

Serum levels of MCP-1, IL10, IL6, IL12, and TNF were measured using the Becton-Dickinson Multiplexed Cytometric Bead Array (Becton-Dickinson Bioscience, Franklin Lakes, NJ) according to manufacturer's instructions. Acquisition was performed using a Becton-Dickinson LSRII flow cytometer.

### Isolation and treatment of peripheral blood human monocytes

Blood from donors was drawn into PaxGene tubes and PBMCs were prepared by Ficoll gradient. PBMCs were differentiated into macrophages with G-CSF for seven days and either left unstimulated or treated with 100 ng/ul LPS for 8 hours. Cells were harvested, and RNA isolation was performed using PAXgene Blood RNA Kit IVD (QIAGEN, USA) or the Rneasy Mini Kit (QIAGEN). Genotyping for rs2803495 and rs2803496 was done using TaqMan SNP Genotyping Assays (Life Technologies, Carlsbad, CA) on an Applied Biosystems 7900HT Fast Real-Time PCR System (Life Technologies).

### Gene ontology pathway and process enrichment analysis

Enrichment terms were determined using Metascape (Tripathi et. al. 2015) using default parameters. Significant differentially expressed genes for comparisons of interest were used as input and murine or human whole genome was used as background as appropriate. RNASeq of oxLDL loaded cells was analyzed using Partek Genomics Suites version 7 build-in pipeline. In short, aligned BAM files were imported and mRNA quantification was performed using mm10 RefSeq Transcripts (2018-11-08), where genes with less than 3 reads were filtered out. Rpkms gene counts were generated and used thereafter. Differentially expressed genes (DEG) were identified by build-in ANOVA model, taking the genotype and treatments as factors and a significant p value of 0.05 was used for generation of DEG lists. All related plots were generated using Partek and enrichment analysis was performed using Cytoscape.

Supplemental figure 1

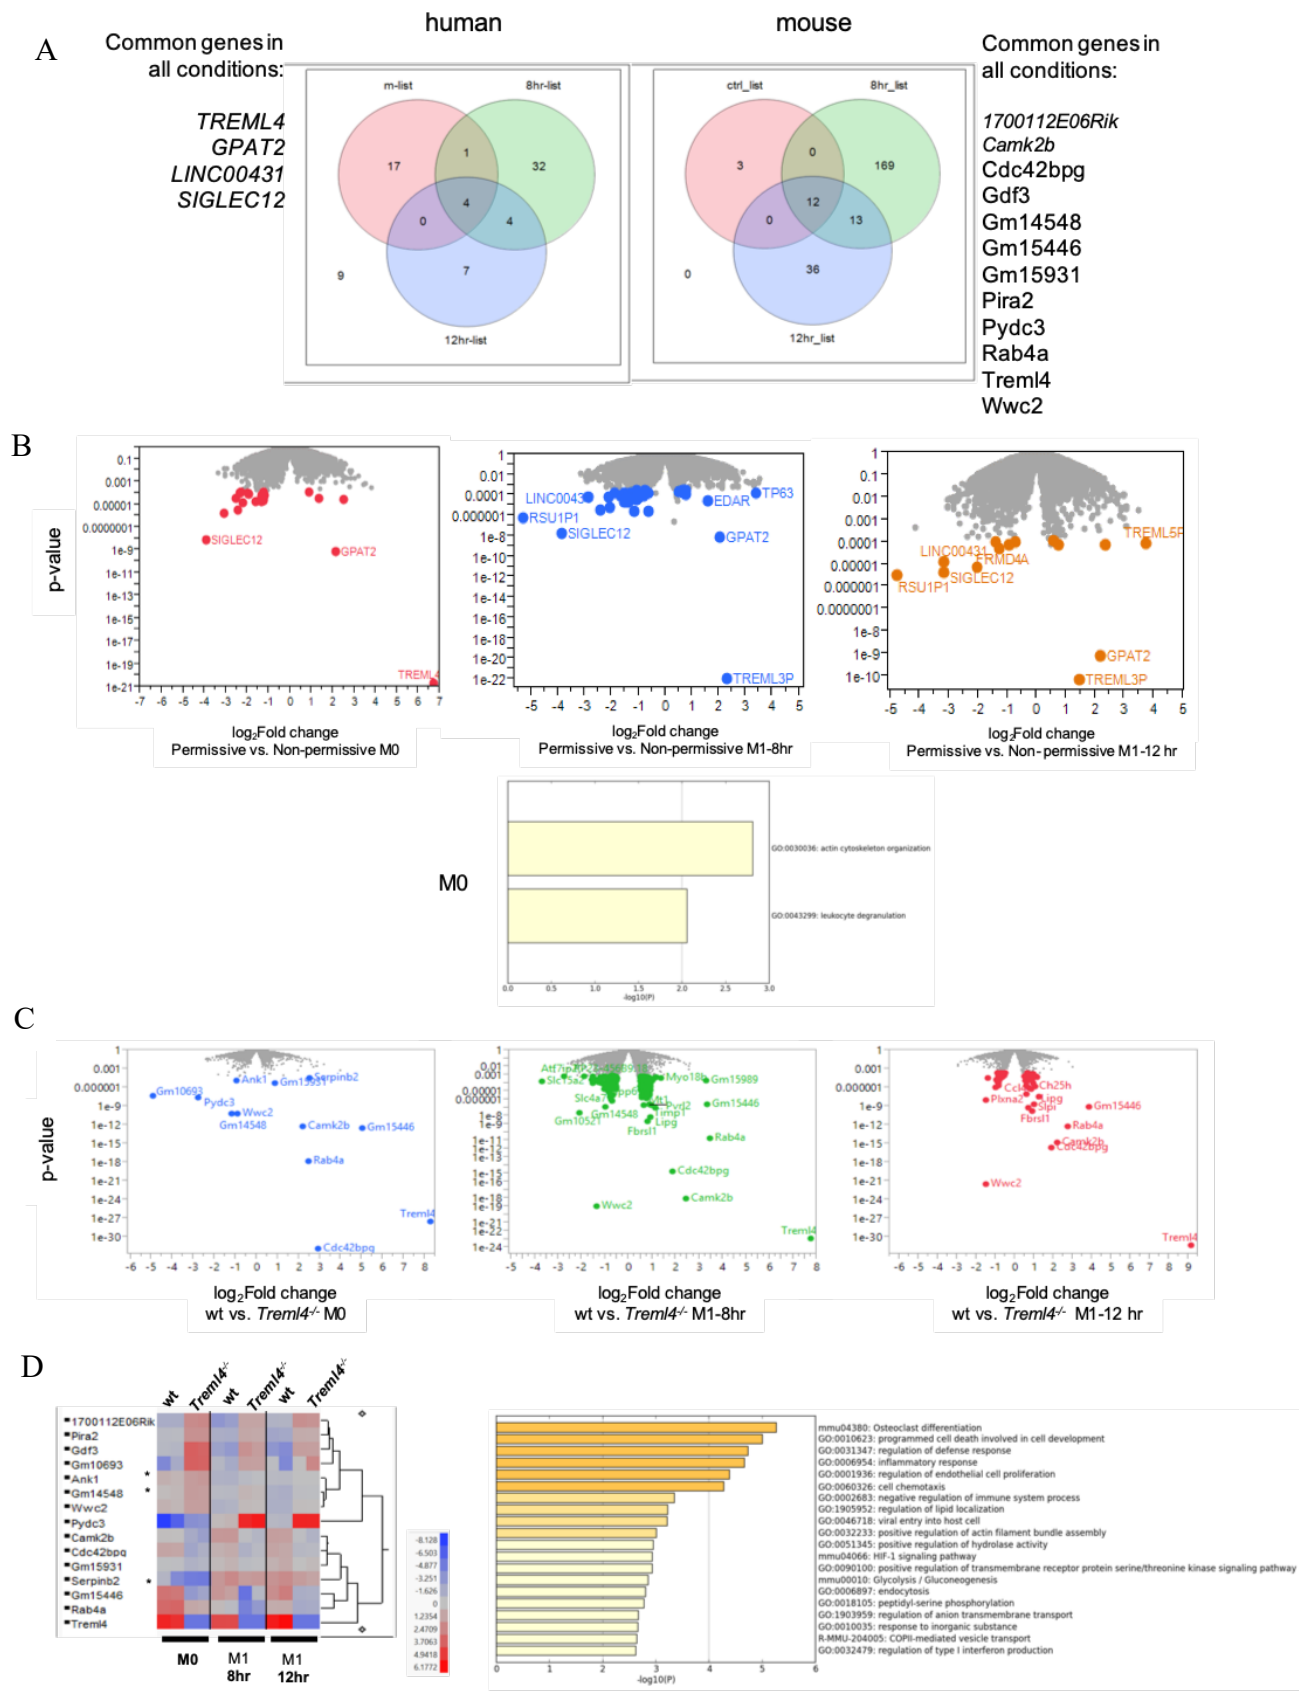

*Trem14* promotes inflammatory programs in human and murine macrophages and alters atherosclerosis lesion composition in the Apolipoprotein E deficient mouse

**Supplemental figure 1-** Transcription profiling of human and murine Trem14 positive M1 macrophages (A) Venn diagrams of differentially expressed genes in both human and murine treatment groups. (B) Volcano plots of DEG in M0, M1-8hr and M1-12hr in permissive human macrophages. Colored dots represent genes that passed FDR and fold-change filters. (C) Volcano plots of DEG in M0, M1-8hr and M1-12hr wild type murine macrophages compared to *Trem14*<sup>-/-</sup>. Colored dots represent genes that passed FDR and fold-change filters. (D) Heatmap of expression values of genes constitutively dysregulated in all conditions in murine macrophages and Enrichment ontology graph of M1-8hr genes.

*Trem14* promotes inflammatory programs in human and murine macrophages and alters atherosclerosis lesion composition in the Apolipoprotein E deficient mouse

## Supplemental figure 2

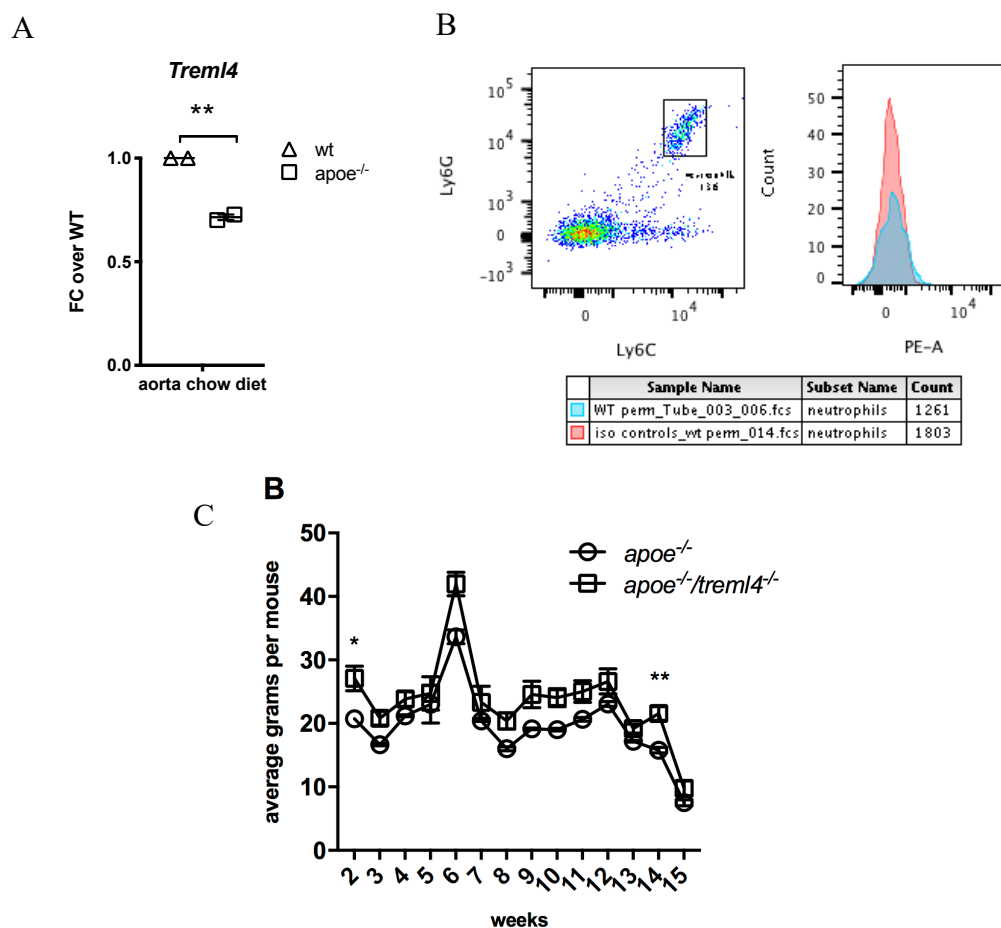

**Supplemental figure 2- *Trem14* expression and food consumption in chow diet fed mice over 16 weeks of WD.**

(A) *Trem14* expression in murine whole aorta lysates in 26-week-old mice. \*\*P<0.01, n=2 per genotype (Student's t-test). (B) Whole blood flow cytometry for *Trem14* expression in Ly6C/Ly6G double-positive cells (neutrophils). (C) Food consumption was monitored per cage and amount consumed was averaged by number of mice, n=14 per genotype (Two-way ANOVA with Sidak's multiple comparison test).

*Trem14* promotes inflammatory programs in human and murine macrophages and alters atherosclerosis lesion composition in the Apolipoprotein E deficient mouse

### Supplemental figure 3

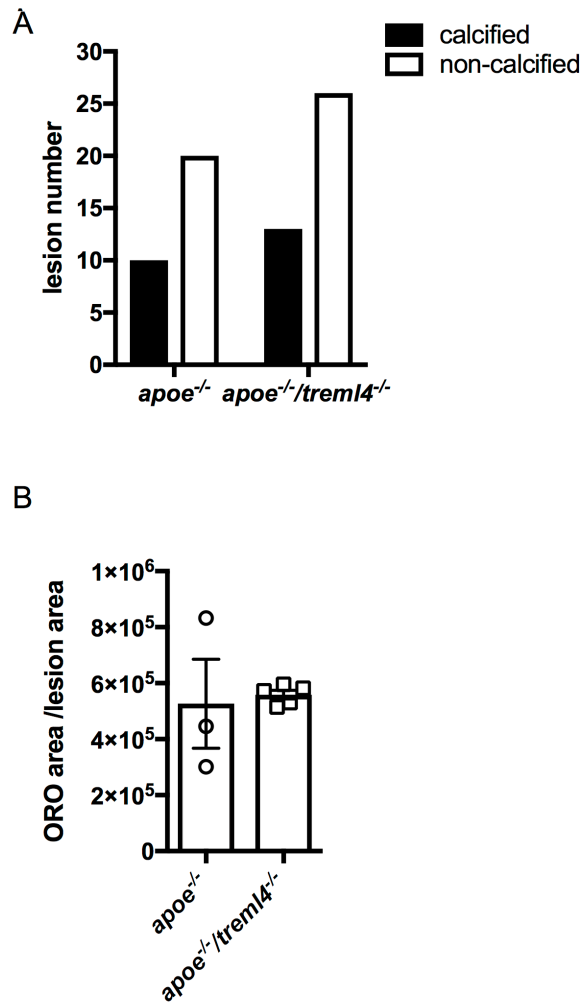

### Supplemental figure 3- Additional features in 16 weeks WD aortic sinus lesions.

(A) Frequency of lesions that were positive for atherosclerotic calcification with in the aortic sinus. N= 30 lesions for *Apoe*<sup>-/-</sup> and n=23 for *Apoe*<sup>-/-</sup>/*Trem14*<sup>-/-</sup>. Data were analyzed by Fisher's exact test. (B) ORO-positive areas normalized to lesion areas, n= 3-5 (Student's t-test).

*Trem14* promotes inflammatory programs in human and murine macrophages and alters atherosclerosis lesion composition in the Apolipoprotein E deficient mouse

## Supplemental figure 4

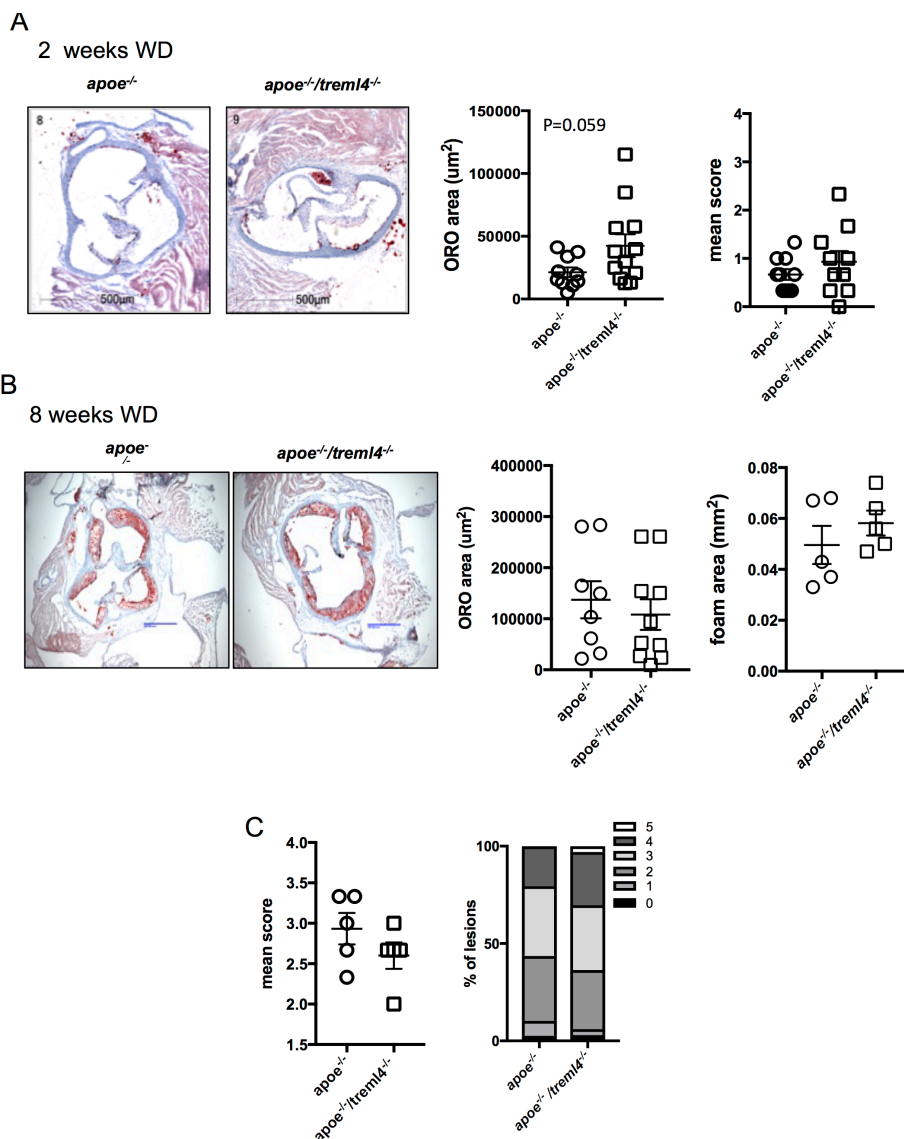

### Supplemental figure 4- *Trem14* effect on atherosclerosis development after 2 and 8 weeks of WD.

(A) Representative images of ORO-stained aortic sinus, ORO-positive and mean histological score of aortic sinus lesions after 2 weeks of WD,  $n=10$  for *Apoe*<sup>-/-</sup> and  $n=12$  for *Apoe*<sup>-/-</sup>/*Trem14*<sup>-/-</sup> (Student's t-test). (B) Representative images of ORO-stained aortic sinus and ORO-positive and foam cell area quantifications in aortic sinus lesions after 8 weeks WD,  $n=8-9$  mice per genotype (Student's t-test). (C) Mean lesion score and frequency of lesion types after 8 weeks WD,  $n=5$  mice per genotype (Student's t-test).

*Trem14* promotes inflammatory programs in human and murine macrophages and alters atherosclerosis lesion composition in the Apolipoprotein E deficient mouse

## Supplemental figure 5

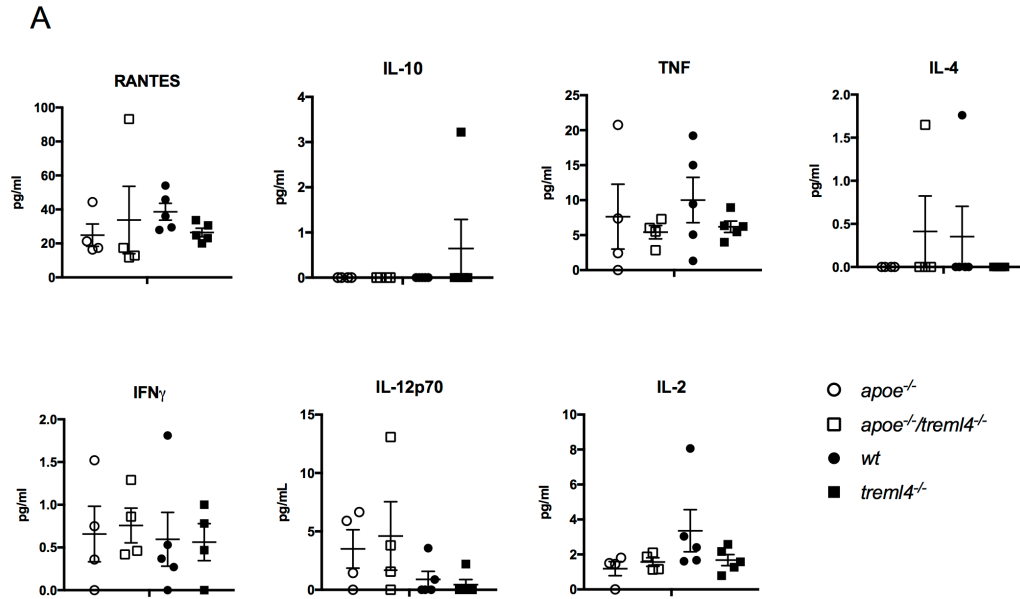

### Supplemental figure 5- Serum cytokines after WD.

(A) Analysis of the indicated cytokines in fasting serum from mice fed WD for 16 weeks. Data represent mean  $\pm$  SEM of individual mice, n= 4 for *Apoe*<sup>-/-</sup> and *Apoe*<sup>-/-</sup>/*Trem14*<sup>-/-</sup> mice, n=5 for *wt* and *Trem14*<sup>-/-</sup> mice (Two-way ANOVA with Tukey post-test).



*Trem14* promotes inflammatory programs in human and murine macrophages and alters atherosclerosis lesion composition in the Apolipoprotein E deficient mouse

## Supplemental figure 6

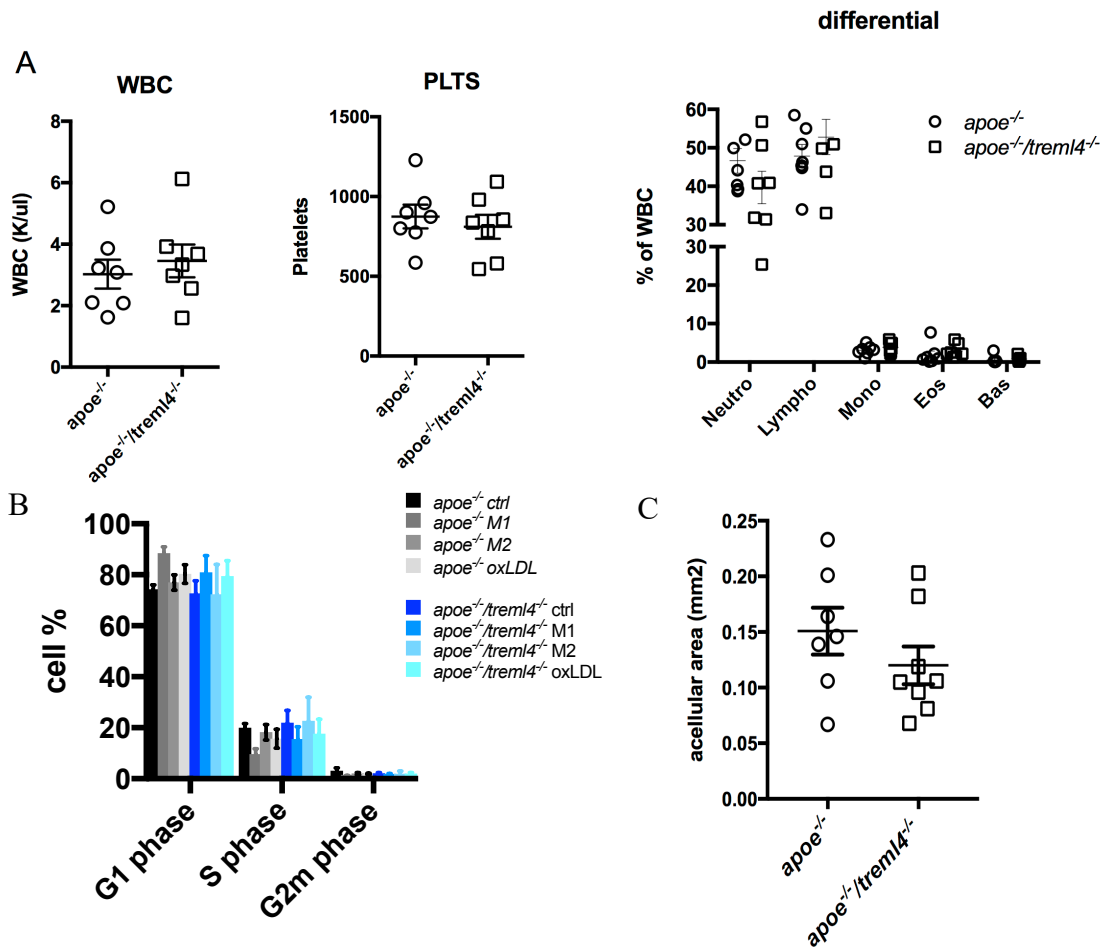

### Supplemental figure 6- Blood cell numbers after 16 weeks HFD

(A) White cells and platelets numbers and differential blood counts in EDTA-blood samples of mice fed WD for 16 weeks, n= 7 mice per genotype. (B) Cell cycle analysis of BMDM treated with LPS (M1), IL4 (M2), oxLDL of left untreated overnight. (C) Morphometric analyses of acellular areas in lesions after 16 weeks of WD, n= 7  $Apoe^{-/-}$ , n=8  $Apoe^{-/-}/Trem14^{-/-}$  (Student's t-test).

*Trem14* promotes inflammatory programs in human and murine macrophages and alters atherosclerosis lesion composition in the Apolipoprotein E deficient mouse

## Supplemental figure 7

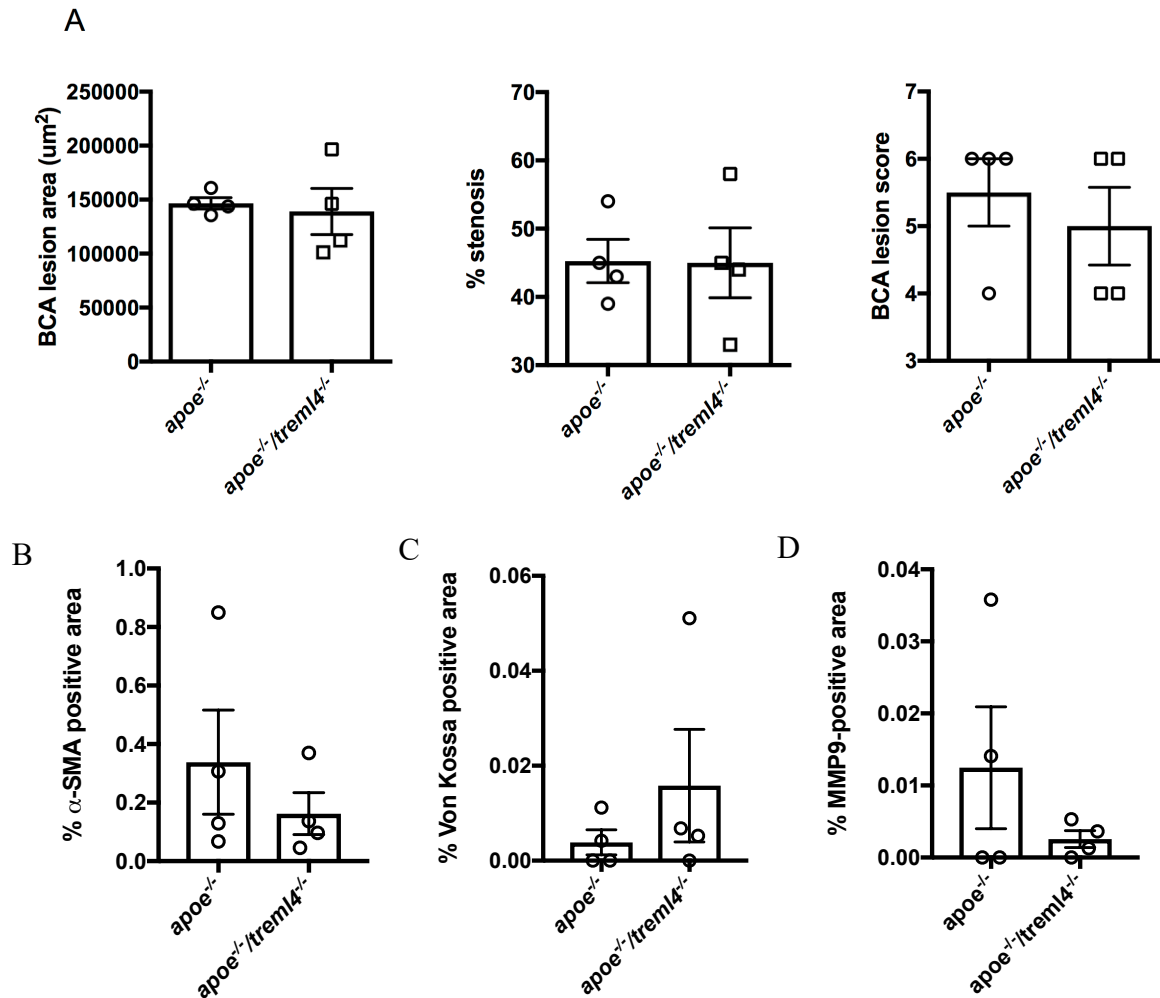

**Supplemental figure 7 - Atherosclerosis development in the brachiocephalic artery after western diet.**

(A) Lesion area, percentage of stenosis and lesion score of atherosclerotic lesions in the BCA after 16 weeks of WD, n=4 per genotype (Student's t-test). (B) Immunostaining for smooth muscle cell actin in the BCA, (C) VonKossa staining and (D) Immunostaining of Mmp-9. Data represents percentage of positive area/total lesion area.

Supplemental figure 8

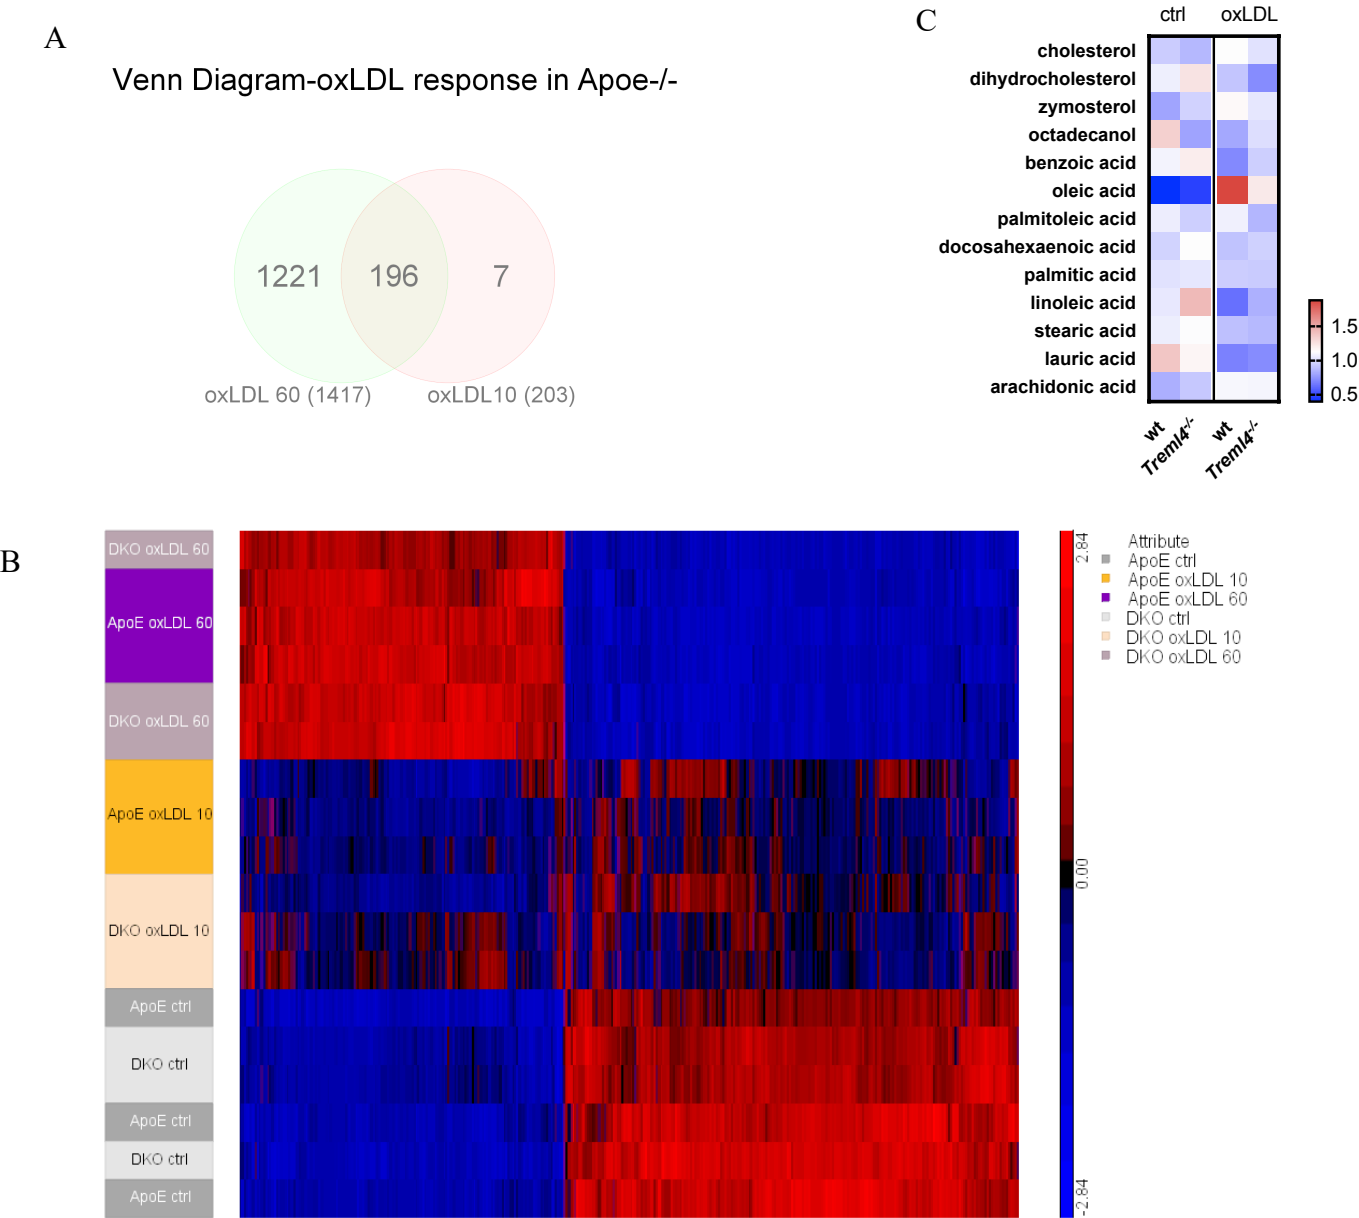

**Supplemental figure 8 – Transcriptomics and metabolomics analysis of oxLDL-loaded macrophages**

(A) Venn diagram of DEG after oxLDL in *ApoE*<sup>-/-</sup> macrophages. (B) Hierarchical clustering of 1009 genes differentially expressed in both genotypes after oxLDL60. (C) Lipid metabolites detected in BMDM after oxLDL-loading.

*Trem14* promotes inflammatory programs in human and murine macrophages and alters atherosclerosis lesion composition in the Apolipoprotein E deficient mouse

Supplemental table 1- RNA-seq human DEG list

**Trem14** promotes inflammatory programs in human and murine macrophages and alters atherosclerosis lesion composition in the Apolipoprotein E deficient mouse

| gene symbol | M0-list | PBMC_list | M1_8 hr-list | M1_1 2hr-list | P-log2FC   | P-pval     | P-FDR-pval | M-log2FC   | M-pval     | M-FDR-pval | 8hr-log2FC | 8hr-pval   | 8hr-FDR-pval | 12hr-log2FC | 12hr-pval  | 12hr-FDR-pval |
|-------------|---------|-----------|--------------|---------------|------------|------------|------------|------------|------------|------------|------------|------------|--------------|-------------|------------|---------------|
| TREM14      | 1       | 1         | 1            | 1             | 7.6776158  | 1.10E-27   | 2.43E-23   | 6.73669607 | 2.01E-21   | 4.44E-17   | 4.01106139 | 2.18E-80   | 4.81E-76     | 3.75394765  | 2.65E-71   | 5.85E-67      |
| AFAF1       | 1       | 1         | 0            | 0             | -1.2223314 | 0.0000696  | 0.1280118  | -1.1768913 | 0.0000571  | 0.08345597 | -0.7363895 | 0.01207826 | 0.57959781   | -1.0097864  | 0.0005724  | 0.2509464     |
| GPAT2       | 1       | 0         | 1            | 1             | 1.39983727 | 0.00016867 | 0.23266834 | 2.12136822 | 7.53E-10   | 8.3097E-06 | 2.02611783 | 8.14E-09   | 5.9886E-05   | 2.20079654  | 7.84E-10   | 5.7679E-06    |
| LINC00431   | 1       | 0         | 1            | 1             | -2.5071127 | 0.00178327 | 0.57041444 | -3.0970125 | 0.00000172 | 0.00949053 | -2.8631526 | 0.0000726  | 0.0784046    | -3.1599383  | 0.000013   | 0.040989      |
| SIGLEC12    | 1       | 0         | 1            | 1             | -2.3955971 | 0.00063292 | 0.40564172 | -3.9367306 | 7.28E-09   | 5.3559E-05 | -3.8687907 | 1.97E-08   | 0.0001087    | -3.1883139  | 0.00000439 | 0.01937834    |
| AP001434.2  | 1       | 0         | 1            | 0             | 0.06377406 | 0.91918065 | 0.99656968 | -1.2249669 | 0.0000224  | 0.05493227 | -1.0853689 | 0.0001241  | 0.10020234   | -0.6938867  | 0.01581706 | 0.70382706    |
| AQP1        | 1       | 0         | 0            | 0             | -0.2156979 | 0.60244207 | 0.99656968 | -1.9562129 | 0.0000979  | 0.11372373 | 0.16716291 | 0.80377165 | 0.99445439   | -0.4435973  | 0.52454276 | 0.98116344    |
| ATF3        | 1       | 0         | 0            | 0             | -0.1529647 | 0.67574408 | 0.99656968 | 1.33520055 | 0.0000309  | 0.05501985 | 0.21418666 | 0.50169265 | 0.98145695   | 0.02587901  | 0.93530303 | 0.9955032     |
| CD42EP1     | 1       | 0         | 0            | 0             | -1.0207353 | 0.09106611 | 0.99656968 | -2.3051758 | 0.00013049 | 0.13387466 | -0.2025659 | 0.00078057 | 0.22373946   | -2.203379   | 0.00024972 | 0.20038641    |
| CH3L1       | 1       | 0         | 0            | 0             | 0.24664423 | 0.68354093 | 0.99656968 | 2.53036791 | 0.0000293  | 0.05501985 | 2.01664144 | 0.00085907 | 0.2340793    | 2.10154373  | 0.00051376 | 0.24535438    |
| IGLON5      | 1       | 0         | 0            | 0             | 0.98881095 | 0.39243736 | 0.99656968 | -2.5408581 | 0.0000329  | 0.05501985 | -0.9588473 | 0.17317195 | 0.92717461   | -1.9712018  | 0.02985855 | 0.76710327    |
| KCNJ15      | 1       | 0         | 0            | 0             | -0.0603593 | 0.84553532 | 0.99656968 | -1.3333314 | 0.0000187  | 0.05159096 | -0.725398  | 0.01941319 | 0.66223882   | -0.5872315  | 0.05844356 | 0.83305709    |
| MRC2        | 1       | 0         | 0            | 0             | -0.5984909 | 0.06931823 | 0.99656968 | -1.3733206 | 0.0000261  | 0.05501985 | -0.8293125 | 0.01097983 | 0.56298202   | -0.9495625  | 0.00368873 | 0.44621771    |
| MYLK2       | 1       | 0         | 0            | 0             | 1.24482733 | 0.29494315 | 0.99656968 | -2.3473849 | 0.0000886  | 0.10863837 | -0.8607735 | 0.39472462 | 0.97979686   | -0.1597387  | 0.88005074 | 0.9955032     |
| NR4A3       | 1       | 0         | 0            | 0             | 0.29896998 | 0.64574679 | 0.99656968 | 0.9020878  | 0.00013344 | 0.13387466 | -0.2635621 | 0.2538479  | 0.95066902   | -0.3839828  | 0.09656376 | 0.86749516    |
| NXPH4       | 1       | 0         | 0            | 0             | 0.27300515 | 0.61706181 | 0.99656968 | -2.2164932 | 0.0000136  | 0.0500276  | -1.0849352 | 0.03324337 | 0.74302303   | -0.1563351  | 0.92142572 | 0.91242572    |
| PTPRB       | 1       | 0         | 0            | 0             | -0.1037173 | 0.87789463 | 0.99656968 | -1.9258518 | 0.0000833  | 0.1081479  | -1.2361238 | 0.01378865 | 0.59733119   | -1.2938484  | 0.00790218 | 0.59934347    |
| PTPRF       | 1       | 0         | 0            | 0             | -0.4539186 | 0.40708246 | 0.99656968 | -2.4424941 | 0.0000346  | 0.01527313 | -1.1155397 | 0.03339067 | 0.74302303   | -0.0368697  | 0.33354464 | 0.9775258     |
| SH3PXD2B    | 1       | 0         | 0            | 0             | -0.412518  | 0.31643747 | 0.99656968 | -1.5882887 | 0.0000185  | 0.05159096 | -0.7983598 | 0.03127366 | 0.73017313   | -0.4313495  | 0.24464712 | 0.93100306    |
| SPATA20P1   | 1       | 0         | 0            | 0             | 0.36508014 | 0.47613148 | 0.99656968 | -1.2518082 | 0.0000349  | 0.05501985 | -0.9330417 | 0.00186035 | 0.32398386   | -0.6726358  | 0.02568433 | 0.75592179    |
| SRCRB4D     | 1       | 0         | 0            | 0             | 0.7155343  | 0.11678892 | 0.99656968 | -1.221536  | 0.00013059 | 0.13387466 | -0.8916027 | 0.02004265 | 0.66713241   | -0.597533   | 0.11286034 | 0.87523953    |
| ZNF462      | 1       | 0         | 0            | 0             | -1.0809653 | 0.16426666 | 0.99656968 | -1.3455147 | 0.0000605  | 0.08345597 | -0.7231908 | 0.02194826 | 0.67450909   | -0.7310587  | 0.01877155 | 0.7118673     |
| TREM13P     | 0       | 1         | 1            | 1             | 1.4343493  | 1.80E-11   | 1.3243E-07 | 0.8244881  | 0.05915795 | 0.99990292 | 2.31438744 | 1.07E-22   | 1.18E-18     | 1.46132952  | 6.71E-11   | 7.4048E-07    |
| TREM15P     | 0       | 1         | 1            | 1             | 1.48276223 | 1.07E-22   | 1.18E-18   | 2.1865178  | 0.0247432  | 0.99990292 | 2.49909367 | 0.01267574 | 0.58651189   | 3.736568    | 0.00008    | 0.13582154    |
| A4GALT      | 0       | 1         | 0            | 0             | 3.42405494 | 0.00000501 | 0.01842929 | 0.30792749 | 0.64493577 | 0.99990292 | 2.5957952  | 0.69637483 | 0.98656569   | 0.02957793  | 0.96452982 | 0.9955032     |
| C1orf226    | 0       | 1         | 0            | 0             | 3.26285465 | 0.0000255  | 0.05628105 | 1.42220833 | 0.05629583 | 0.99990292 | 0.49049384 | 0.52735241 | 0.98145695   | 1.02849971  | 0.17847848 | 0.9101383     |
| C4BPA       | 0       | 1         | 0            | 0             | -4.0143555 | 0.0000436  | 0.08748142 | -0.7311975 | 0.53056499 | 0.99990292 | -0.9379148 | 0.37229054 | 0.97841581   | 0.13891258  | 0.90203319 | 0.9955032     |
| EEF1A2      | 0       | 1         | 0            | 0             | -2.0877228 | 0.0000851  | 0.14448016 | -0.7147351 | 0.11427438 | 0.99990292 | -0.2923736 | 0.51798177 | 0.98145695   | -0.5561513  | 0.21474053 | 0.93100306    |
| IFI27       | 0       | 1         | 0            | 0             | 3.25697192 | 0.00000205 | 0.00904911 | 1.29091194 | 0.0601581  | 0.99990292 | -0.1831483 | 0.78881287 | 0.99445439   | -0.1118403  | 0.87006985 | 0.9955032     |
| KB-226F.1.2 | 0       | 1         | 0            | 0             | 4.87480769 | 0.00000919 | 0.02253694 | 3.8300806  | 0.00031171 | 0.24570698 | 3.49448702 | 0.00141543 | 0.2835185    | 2.69562824  | 0.01530624 | 0.69867899    |
| LINC00680   | 0       | 1         | 0            | 0             | -1.4949907 | 2.99E-07   | 0.00164981 | -0.5284471 | 0.04056724 | 0.99990292 | -0.2381106 | 0.36990974 | 0.97803949   | -0.5471713  | 0.04274947 | 0.80574174    |
| PCGF3       | 0       | 1         | 0            | 0             | -0.5477377 | 0.00000783 | 0.02253694 | -0.2012192 | 0.07781365 | 0.99990292 | -0.1542709 | 0.17978217 | 0.93623686   | -0.1531751  | 0.182221   | 0.91271159    |
| PVRL2       | 0       | 1         | 0            | 0             | -2.0147952 | 0.00000914 | 0.02253694 | -0.2731719 | 0.54421832 | 0.99990292 | -0.2237368 | 0.61930192 | 0.98145695   | -0.0594654  | 0.89496091 | 0.9955032     |
| COL1A1      | 0       | 0         | 1            | 1             | -0.2925796 | 0.30504325 | 0.99656968 | -1.0287655 | 0.00018419 | 0.17674841 | -1.3660215 | 0.0000203  | 0.03733678   | -1.2645359  | 0.0000473  | 0.13049479    |
| FRMD4A      | 0       | 0         | 1            | 1             | -0.0128618 | 0.97794511 | 0.99939567 | -0.7899489 | 0.07891175 | 0.99990292 | -2.0648189 | 0.00000569 | 0.0125584    | -0.204467   | 0.00000681 | 0.02050559    |
| RSU1P1      | 0       | 0         | 1            | 1             | -0.3731425 | 0.00722764 | 0.87649046 | -3.0591845 | 0.00285422 | 0.59429666 | -5.3221294 | 6.29E-07   | 0.00231378   | -0.7820886  | 0.00000032 | 0.01666361    |
| ASNS        | 0       | 0         | 1            | 0             | 0.27654958 | 0.19307871 | 0.99656968 | 0.38018009 | 0.06943826 | 0.99990292 | 0.80005215 | 0.00011581 | 0.09831187   | 0.78966293  | 0.0001824  | 0.18088748    |
| BCL2L11     | 0       | 0         | 1            | 0             | -0.1111818 | 0.55924252 | 0.99656968 | 0.23208765 | 0.21183437 | 0.99990292 | 0.67230008 | 0.00031564 | 0.1482232    | 0.57242658  | 0.00206744 | 0.38473908    |
| BCL2F1      | 0       | 0         | 1            | 0             | -0.1520241 | 0.63376298 | 0.99656968 | -0.0270241 | 0.9267437  | 0.99990292 | -1.0595107 | 0.00030244 | 0.14510963   | -0.6623289  | 0.02345697 | 0.75592179    |
| CDZAF1      | 0       | 0         | 1            | 0             | 0.10132    | 0.58724821 | 0.99656968 | 0.23199757 | 0.19225733 | 0.99990292 | 0.69448356 | 0.00014187 | 0.10020234   | 0.58778802  | 0.00136308 | 0.33441475    |
| CREB5       | 0       | 0         | 1            | 0             | 0.07799987 | 0.77898609 | 0.99656968 | 0.26355805 | 0.34986522 | 0.99990292 | -1.2070046 | 0.0000453  | 0.06248852   | -0.6283213  | 0.04023632 | 0.80228319    |
| CRYBB1      | 0       | 0         | 1            | 0             | 0.64532705 | 0.22752726 | 0.99656968 | -0.4894195 | 0.03959315 | 0.99990292 | -1.0858632 | 0.0000409  | 0.06018026   | -0.1062904  | 0.75725928 | 0.9950863     |
| DHX32       | 0       | 0         | 1            | 0             | 0.23351792 | 0.22162384 | 0.99656968 | 0.16813031 | 0.30226347 | 0.99990292 | 0.62185251 | 0.00026744 | 0.13553651   | 0.06583584  | 0.00584813 | 0.5400589     |
| DIRC2       | 0       | 0         | 1            | 0             | 0.0611211  | 0.80745604 | 0.99656968 | 0.00037426 | 0.99875034 | 0.99990292 | -0.9611571 | 0.0000873  | 0.08758174   | -0.655218   | 0.00684221 | 0.56867649    |
| EDAR        | 0       | 0         | 1            | 0             | 0.67562226 | 0.08657896 | 0.99656968 | 0.65718718 | 0.05582373 | 0.99990292 | 1.60923384 | 0.00003    | 0.047295     | 0.68134386  | 0.06591446 | 0.84038778    |
| GAL3ST4     | 0       | 0         | 1            | 0             | -0.3050723 | 0.32480742 | 0.99656968 | -1.0766188 | 0.00039344 | 0.248102   | -1.1994108 | 0.00013516 | 0.10020234   | 0.0806725   | 0.79972465 | 0.9955032     |
| HTRA1       | 0       | 0         | 1            | 0             | 0.11798466 | 0.79085663 | 0.99656968 | -0.9897564 | 0.01369004 | 0.99990292 | -1.5122277 | 0.00017815 | 0.10626769   | -1.1690105  | 0.00430079 | 0.47148409    |
| IVNS1ABP    | 0       | 0         | 1            | 0             | 0.15100843 | 0.47063542 | 0.99656968 | -0.0464603 | 0.82317584 | 0.99990292 | 0.76670229 | 0.00024203 | 0.12825563   | 0.55682122  | 0.00757715 | 0.59795494    |
| MED25       | 0       | 0         | 1            | 0             | -0.205019  | 0.24393312 | 0.99656968 | -0.3024817 | 0.08576515 | 0.99990292 | -0.6652606 | 0.00015768 | 0.10020234   | -0.5114414  | 0.0036859  | 0.44621771    |
| MERTK       | 0       | 0         | 1            | 0             | 0.0447676  | 0.90582487 | 0.99656968 | -0.6300098 | 0.06671493 | 0.99990292 | -1.3157031 | 0.00016016 | 0.10020234   | -0.5213489  | 0.13506003 | 0.88519871    |
| MGST3       | 0       | 0         | 1            | 0             | -0.3008632 | 0.07188522 | 0.99656968 | -0.395115  | 0.01405921 | 0.99990292 | -0.6143632 | 0.00014646 | 0.10020234   | -0.3664637  | 0.02413528 | 0.75592179    |
| MMP2        | 0       | 0         | 1            | 0             | -1.3281375 | 0.10256056 | 0.99656968 | -1.6143293 | 0.0022309  | 0.53332484 | -2.1207819 | 0.0000611  | 0.07318279   | -1.7158591  | 0.00118954 | 0.33441475    |
| OSBP13      | 0       | 0         | 1            | 0             | -0.0645419 | 0.66863558 | 0.99656968 | -0.013996  | 0.91381733 | 0.99990292 | 0.50789572 | 0.00019645 | 0.11117446   | 0.32395077  | 0.0154115  | 0.69867899    |
| OSM         | 0       | 0         | 1            | 0             | 0.09256941 | 0.76314231 | 0.99656968 | -0.5068165 | 0.08145977 | 0.99990292 | -1.048731  | 0.00030013 | 0.14510963   | -0.5820053  | 0.04455534 | 0.80875958    |
| PDK1        | 0       | 0         | 1            | 0             | 0.08726611 | 0.67731251 | 0.99656968 | 0.28057089 | 0.14907545 | 0.99990292 | 0.73024558 | 0.00024406 | 0.12825563   | 0.21748892  | 0.27466122 | 0.93295223    |
| PHACTR4     | 0       | 0         | 1            | 0             | 0.11934316 | 0.42174304 | 0.99656968 | -0.0287994 | 0.83086225 | 0.99990292 | -0.6360523 | 0.00000225 | 0.00709425   | -0.43307019 | 0.00129875 | 0.33441475    |
| PTPRU       | 0       | 0         | 1            | 0             | 0.16439607 | 0.74103586 | 0.99656968 | -0.4514273 | 0.21032468 | 0.99990292 | -1.5018645 | 0.0000181  | 0.03631683   | -1.269      |            |               |

*Trem14* promotes inflammatory programs in human and murine macrophages and alters atherosclerosis lesion composition in the Apolipoprotein E deficient mouse

| GroupID   | Category                | Term        | Description                              | LogP       | Log(q-value) | t     | InTerm_InLis<br>Symbols             |
|-----------|-------------------------|-------------|------------------------------------------|------------|--------------|-------|-------------------------------------|
| 1_Summary | GO Biological Processes | GO:0042475  | odontogenesis of dentin-containing tooth | -5.007413  | -0.6960407   | 4/87  | HTRA1,TP63,BCL2L11,EDAR,MERTK,ASNS  |
| 1_Member  | GO Biological Processes | GO:0042475  | odontogenesis of dentin-containing tooth | -5.007413  | -0.6960407   | 4/87  | HTRA1,TP63,BCL2L11,EDAR             |
| 1_Member  | GO Biological Processes | GO:0042476  | odontogenesis                            | -4.4003432 | -0.3900008   | 4/124 | HTRA1,TP63,BCL2L11,EDAR             |
| 1_Member  | GO Biological Processes | GO:0048608  | reproductive structure development       | -2.3889541 | 0            | 4/425 | HTRA1,TP63,BCL2L11,MERTK            |
| 1_Member  | GO Biological Processes | GO:0061458  | reproductive system development          | -2.3781187 | 0            | 4/428 | HTRA1,TP63,BCL2L11,MERTK            |
| 1_Member  | GO Biological Processes | GO:0048732  | gland development                        | -2.3602501 | 0            | 4/433 | ASNS,TP63,BCL2L11,EDAR              |
| 1_Member  | GO Biological Processes | GO:0007548  | sex differentiation                      | -2.0879493 | 0            | 3/268 | TP63,BCL2L11,MERTK                  |
| 2_Summary | Reactome Gene Sets      | R-HSA-14742 | Degradation of the extracellular matrix  | -2.8797083 | 0            | 3/140 | COL7A1,MMP2,HTRA1,TGFBI,ZNF516,TP63 |
| 2_Member  | Reactome Gene Sets      | R-HSA-14742 | Degradation of the extracellular matrix  | -2.8797083 | 0            | 3/140 | COL7A1,MMP2,HTRA1                   |
| 2_Member  | GO Biological Processes | GO:0030198  | extracellular matrix organization        | -2.7008997 | 0            | 4/348 | COL7A1,MMP2,HTRA1,TGFBI             |
| 2_Member  | GO Biological Processes | GO:0043062  | extracellular structure organization     | -2.4827585 | 0            | 4/400 | COL7A1,MMP2,HTRA1,TGFBI             |
| 2_Member  | GO Biological Processes | GO:0061448  | connective tissue development            | -2.1377279 | 0            | 3/257 | COL7A1,TGFBI,ZNF516                 |
| 2_Member  | GO Biological Processes | GO:0001501  | skeletal system development              | -2.1264012 | 0            | 4/505 | COL7A1,MMP2,TGFBI,TP63              |
| 3_Summary | GO Biological Processes | GO:0035148  | tube formation                           | -2.844584  | 0            | 3/144 | BCL2L11,EDAR,PHACTR4                |
| 3_Member  | GO Biological Processes | GO:0035148  | tube formation                           | -2.844584  | 0            | 3/144 | BCL2L11,EDAR,PHACTR4                |
| 4_Summary | GO Biological Processes | GO:0048598  | embryonic morphogenesis                  | -2.7469534 | 0            | 5/573 | COL7A1,MMP2,TP63,BCL2L11,PHACTR4    |
| 4_Member  | GO Biological Processes | GO:0048598  | embryonic morphogenesis                  | -2.7469534 | 0            | 5/573 | COL7A1,MMP2,TP63,BCL2L11,PHACTR4    |
| 5_Summary | GO Biological Processes | GO:0097193  | intrinsic apoptotic signaling pathway    | -2.0070767 | 0            | 3/287 | PDK1,BCL2L11,IVNS1ABP               |
| 5_Member  | GO Biological Processes | GO:0097193  | intrinsic apoptotic signaling pathway    | -2.0070767 | 0            | 3/287 | PDK1,BCL2L11,IVNS1ABP               |

*Trem14* promotes inflammatory programs in human and murine macrophages and alters atherosclerosis lesion composition in the Apolipoprotein E deficient mouse

### Supplemental table 3- RNA-seq mouse DEG list 5%FDR, 1.4log2 FC

| gene symbol   | M0 | M1_8hr | M2_12hr | M0-log2FC    | M0-pval     | M1_8hr-log2FC | M1_8hr-pval | M0_12hr-log2FC | M0_12hr-pval | FDR-M0-pval  | FDR-M1_8hr-pval | FDR-M1_12hr-pval |
|---------------|----|--------|---------|--------------|-------------|---------------|-------------|----------------|--------------|--------------|-----------------|------------------|
| 1700112E06Rik | 1  | 1      | 1       | 3.878504335  | 1.14E-61    | 3.976937508   | 2.40E-40    | 3.054650036    | 7.11E-44     | 6.22E-58     | 9.82E-37        | 2.91E-40         |
| Camk2b        | 1  | 1      | 1       | -2.218742971 | 6.12E-13    | -2.427037657  | 8.92E-19    | -2.211576832   | 1.43E-15     | 1.25E-09     | 2.09E-15        | 2.93E-12         |
| Cdc42bpg      | 1  | 1      | 1       | -2.943262253 | 1.22E-32    | -1.881287992  | 1.69E-15    | -1.920681133   | 2.29E-16     | 4.99E-29     | 3.46E-12        | 5.35E-13         |
| Gdf3          | 1  | 1      | 1       | 4.431008241  | 9.93E-98    | 4.314256808   | 2.10E-63    | 4.838845844    | 3.79E-60     | 1.63E-93     | 1.15E-59        | 2.07E-56         |
| Gm14548       | 1  | 1      | 1       | 1.184144527  | 5.09E-11    | 1.010543703   | 0.00000118  | 1.01071475     | 0.000000895  | 9.26E-08     | 0.000137942     | 0.000770925      |
| Gm15446       | 1  | 1      | 1       | -5.044054737 | 2.96E-13    | -3.322539447  | 0.000000261 | -3.853953114   | 6.23E-10     | 6.92E-10     | 0.000237307     | 8.50E-07         |
| Gm15931       | 1  | 1      | 1       | -0.88618239  | 0.00000506  | -0.976244433  | 0.000000183 | -0.790615675   | 0.0000192    | 0.006370151  | 0.000199665     | 0.0098196        |
| Pira2         | 1  | 1      | 1       | 2.53410646   | 5.56E-74    | 2.536992737   | 7.97E-64    | 2.886718122    | 1.55E-74     | 4.55E-70     | 6.52E-60        | 1.27E-70         |
| Pycd3         | 1  | 1      | 1       | 2.802769239  | 0.000000023 | 4.973041367   | 2.45E-218   | 6.201898877    | 2.93E-301    | 3.42E-05     | 4.01E-214       | 4.80E-297        |
| Rab4a         | 1  | 1      | 1       | -2.488220952 | 1.43E-18    | -3.441841693  | 1.80E-11    | -2.734320405   | 5.60E-13     | 3.90E-15     | 3.27E-08        | 1.02E-09         |
| Trem14        | 1  | 1      | 1       | -8.255290056 | 2.77E-28    | -7.739453145  | 1.15E-23    | -9.162091448   | 3.88E-32     | 9.07E-25     | 3.76E-20        | 1.27E-28         |
| Wwv2          | 1  | 1      | 1       | 0.895925059  | 6.66E-11    | 1.358009358   | 1.02E-19    | 1.480675842    | 2.69E-22     | 1.09E-07     | 2.78E-16        | 7.34E-19         |
| Ank1          | 1  | 0      | 0       | 0.964746567  | 0.000013    | 0.682702939   | 0.011212556 | 0.467694716    | 0.063106137  | 0.015197     | 0.150413682     | 0.99911736       |
| Gm10693       | 1  | 0      | 0       | 4.913796737  | 4.57E-08    | 2.237979759   | 0.011369575 | 2.502626859    | 0.00459953   | 6.23E-05     | 0.151148166     | 0.34530233       |
| Serp1b2       | 1  | 0      | 0       | -2.514443496 | 0.0000331   | -0.547801438  | 0.086542548 | -0.740440944   | 0.021168514  | 0.036114307  | 0.373547955     | 0.734764146      |
| A530040E14Rik | 0  | 1      | 1       | -0.429181642 | 0.423851175 | -0.735200557  | 0.00000178  | -0.756796887   | 0.000000819  | 0.999996572  | 0.00130928      | 0.000744653      |
| Ch25h         | 0  | 1      | 1       | -0.680318516 | 0.135752882 | -0.823895429  | 0.000229246 | -1.247469642   | 0.000000027  | 0.999996572  | 0.029776508     | 2.95E-05         |
| Fhrs1         | 0  | 1      | 1       | -0.246420289 | 0.078860646 | -0.817603997  | 2.19E-09    | -0.883698665   | 1.41E-10     | 0.999996572  | 3.58E-06        | 2.31E-07         |
| Gm15056       | 0  | 1      | 1       | 0.565249444  | 0.509500412 | -0.895037538  | 0.00000318  | -0.689502918   | 0.0000312    | 0.999996572  | 0.001927551     | 0.01458912       |
| Hiipda        | 0  | 1      | 1       | -0.077431392 | 0.6161907   | -0.552752887  | 0.0000241   | -0.569455927   | 0.0000119    | 0.999996572  | 0.008391928     | 0.00695555       |
| Ier2          | 0  | 1      | 1       | -0.255505285 | 0.168476729 | -0.694786935  | 0.000166469 | -0.726846924   | 0.000110668  | 0.999996572  | 0.024786381     | 0.033540602      |
| Ildr1         | 0  | 1      | 1       | -0.029001357 | 0.972390315 | -0.729143985  | 0.000461558 | -0.832616907   | 0.0000976    | 0.999996572  | 0.039548996     | 0.030717723      |
| Lipg          | 0  | 1      | 1       | -0.247778696 | 0.740656542 | -0.10690072   | 6.63E-09    | -0.977245768   | 1.63E-09     | 0.999996572  | 9.86E-06        | 2.05E-06         |
| Mt1           | 0  | 1      | 1       | 0.175584813  | 0.158166825 | -0.63763422   | 0.000000214 | -0.591618536   | 0.00000166   | 0.999996572  | 0.000218895     | 0.001293693      |
| Mt2           | 0  | 1      | 1       | 0.348056667  | 0.113553526 | -0.628412974  | 0.000517286 | -0.784593088   | 0.0000158    | 0.999996572  | 0.043285482     | 0.008619427      |
| Nfr3          | 0  | 1      | 1       | -0.026842667 | 0.847776828 | -0.503801857  | 0.000149607 | -0.594182974   | 0.00000822   | 0.999996572  | 0.023186299     | 0.005381141      |
| Thbs4         | 0  | 1      | 1       | 0.243109758  | 0.769492315 | -0.886021868  | 0.000062    | -0.920725213   | 0.0000227    | 0.999996572  | 0.014921941     | 0.011257824      |
| Timp1         | 0  | 1      | 1       | 0.441499918  | 0.134219818 | -1.146535668  | 8.47E-08    | -1.035620034   | 0.00000129   | 0.999996572  | 0.000106631     | 0.001055607      |
| Z310022B05Rik | 0  | 1      | 0       | -0.114994332 | 0.434917523 | -0.540431566  | 0.000256796 | -0.258546991   | 0.075667297  | 0.999996572  | 0.030676813     | 0.99911736       |
| Abca5         | 0  | 1      | 0       | 0.606895368  | 0.030360815 | 1.532124383   | 0.000613751 | 0.579310313    | 0.170186805  | 0.999996572  | 0.04652187      | 0.99911736       |
| Adam10        | 0  | 1      | 0       | 0.052933524  | 0.703754854 | 0.534461507   | 0.000150174 | 0.114213569    | 0.418926564  | 0.999996572  | 0.023186299     | 0.99911736       |
| Akt2          | 0  | 1      | 0       | -0.074357644 | 0.6215462   | -0.56683235   | 0.000166978 | -0.224187989   | 0.138445096  | 0.999996572  | 0.024786381     | 0.99911736       |
| Aldh2         | 0  | 1      | 0       | -0.114038796 | 0.414208007 | -0.513241707  | 0.000245789 | -0.188727029   | 0.178158223  | 0.999996572  | 0.030129204     | 0.99911736       |
| Ankrd28       | 0  | 1      | 0       | 0.090648063  | 0.661731642 | 0.901516344   | 0.0000176   | 0.497170975    | 0.017494333  | 0.999996572  | 0.006806768     | 0.686600129      |
| Arf5          | 0  | 1      | 0       | -0.13069151  | 0.304319339 | -0.520036706  | 0.0000403   | -0.324675574   | 0.010440439  | 0.999996572  | 0.011685898     | 0.517984147      |
| Atf7ip2       | 0  | 1      | 0       | 0.456617023  | 0.512640941 | 2.756463147   | 0.000697459 | 1.3758752      | 0.052382491  | 0.999996572  | 0.049453665     | 0.988127267      |
| AW549877      | 0  | 1      | 0       | 0.074396389  | 0.711641435 | 0.698145653   | 0.000494986 | 0.0773471      | 0.698401201  | 0.999996572  | 0.041757427     | 0.99911736       |
| Be11          | 0  | 1      | 0       | 0.235066225  | 0.209958753 | 0.661527342   | 0.000708921 | 0.237768635    | 0.21148836   | 0.999996572  | 0.049453665     | 0.99911736       |
| C330027C09Rik | 0  | 1      | 0       | 0.41495755   | 0.158611802 | 1.149726755   | 0.000403182 | 0.006962586    | 0.983818489  | 0.999996572  | 0.037922279     | 0.99911736       |
| Calcr1        | 0  | 1      | 0       | 0.16956079   | 0.337886219 | 0.74596499    | 0.0000252   | 0.655895652    | 0.000669842  | 0.999996572  | 0.00859215      | 0.109193142      |
| Cav2          | 0  | 1      | 0       | 0.113396231  | 0.517995488 | 0.657912886   | 0.000268488 | 0.592169051    | 0.001388273  | 0.999996572  | 0.030988849     | 0.170830646      |
| Cbr2          | 0  | 1      | 0       | -0.608814062 | 0.02241599  | -1.023072884  | 0.000185076 | -0.663601883   | 0.017420911  | 0.999996572  | 0.026416005     | 0.68536209       |
| Ccr12         | 0  | 1      | 0       | -0.047045399 | 0.771225013 | -0.566698814  | 0.000091    | -0.395308441   | 0.006412226  | 0.999996572  | 0.016923932     | 0.394092854      |
| Cd207         | 0  | 1      | 0       | -0.434446503 | 0.001863782 | -0.590779505  | 0.0000369   | -0.194043715   | 0.264782983  | 0.999996572  | 0.011183433     | 0.99911736       |
| Cd300lf       | 0  | 1      | 0       | -0.194539322 | 0.465637443 | 0.848129934   | 0.00041499  | 0.292578082    | 0.190552805  | 0.999996572  | 0.038589354     | 0.99911736       |
| Cd59a         | 0  | 1      | 0       | -0.65851128  | 0.000162171 | -0.746006899  | 0.0000833   | -0.251258616   | 0.227534419  | 0.120640481  | 0.0162491       | 0.99911736       |
| Cd80          | 0  | 1      | 0       | 0.28165925   | 0.258705038 | -0.79593002   | 0.000445871 | -0.608118842   | 0.008146263  | 0.999996572  | 0.039453725     | 0.455023004      |
| Celf2         | 0  | 1      | 0       | 0.08524644   | 0.540625284 | 0.515425859   | 0.000269118 | 0.130867672    | 0.361514477  | 0.999996572  | 0.030988849     | 0.99911736       |
| Celsr3        | 0  | 1      | 0       | -0.159798468 | 0.402762215 | -0.777435432  | 0.000652297 | -0.049683154   | 0.792387146  | 0.999996572  | 0.047295217     | 0.99911736       |
| Cnn3          | 0  | 1      | 0       | -0.419776813 | 0.353913441 | -0.679801655  | 0.0000712   | -0.478296163   | 0.005443792  | 0.999996572  | 0.015746746     | 0.374340756      |
| Cnppd1        | 0  | 1      | 0       | -0.057126639 | 0.721298425 | -0.606407913  | 0.000155582 | -0.229268423   | 0.153596251  | 0.999996572  | 0.023576435     | 0.99911736       |
| Ctdnep1       | 0  | 1      | 0       | -0.07641251  | 0.634715425 | -0.64105335   | 0.000067    | -0.320321139   | 0.04675953   | 0.999996572  | 0.015229472     | 0.962599331      |
| Dennd1b       | 0  | 1      | 0       | 0.135567074  | 0.391181075 | 0.67304606    | 0.0000171   | -0.045317466   | 0.771014955  | 0.999996572  | 0.006806768     | 0.99911736       |
| Dgka          | 0  | 1      | 0       | -0.134186051 | 0.510610855 | -0.686897321  | 0.000632643 | -0.02549101    | 0.901483676  | 0.999996572  | 0.046849934     | 0.99911736       |
| Dmwd          | 0  | 1      | 0       | -0.479608781 | 0.02837344  | -0.673163823  | 0.0000148   | -0.389718986   | 0.008731996  | 0.999996572  | 0.006503332     | 0.47320479       |
| Dnase1l3      | 0  | 1      | 0       | 0.267369803  | 0.678992019 | -0.702287441  | 0.000262483 | -0.538047044   | 0.005114923  | 0.999996572  | 0.030905013     | 0.360822542      |
| Ece1          | 0  | 1      | 0       | -0.11887959  | 0.470191187 | -0.770171907  | 0.00000244  | -0.273146105   | 0.097186149  | 0.999996572  | 0.001597322     | 0.99911736       |
| Edil3         | 0  | 1      | 0       | 0.716327812  | 0.002655771 | 0.901962144   | 0.0003883   | -0.022678887   | 0.921839516  | 0.739590358  | 0.037789094     | 0.99911736       |
| Ehd1          | 0  | 1      | 0       | -0.223172761 | 0.212175294 | -0.616938928  | 0.000536675 | -0.221487056   | 0.214283211  | 0.999996572  | 0.043697627     | 0.99911736       |
| Eif3f         | 0  | 1      | 0       | -0.027680659 | 0.855088831 | -0.540179032  | 0.00038837  | -0.279156652   | 0.067463149  | 0.999996572  | 0.037789094     | 0.99911736       |
| Eli2          | 0  | 1      | 0       | 0.094047389  | 0.548821088 | 0.536223392   | 0.000626681 | 0.082241753    | 0.598154037  | 0.999996572  | 0.046849934     | 0.99911736       |
| Eva1b         | 0  | 1      | 0       | -0.273735335 | 0.184685038 | -0.720146595  | 0.000213472 | -0.48228401    | 0.014172946  | 0.999996572  | 0.028873411     | 0.609465384      |
| F10           | 0  | 1      | 0       | -0.283842371 | 0.098025384 | -0.614963426  | 0.000291734 | -0.259388435   | 0.126472213  | 0.999996572  | 0.032479719     | 0.99911736       |
| Fabp7         | 0  | 1      | 0       | -0.700284503 | 0.000792223 | -0.732461757  | 0.000546221 | -0.462506237   | 0.032983577  | 0.381338871  | 0.044036714     | 0.852538976      |
| Fam115a       | 0  | 1      | 0       | 0.1077404544 | 0.002018429 | 1.542635044   | 0.000094    | 1.302249776    | 0.00226894   | 0.6741155286 | 0.017285438     | 0.238035077      |
| Fam134a       | 0  | 1      | 0       | -0.074701219 | 0.657329951 | -0.674868283  | 0.0000645   | -0.263293651   | 0.119406293  | 0.999996572  | 0.014936856     | 0.99911736       |
| Fam135a       | 0  | 1      | 0       | 0.626871143  | 0.033627533 | 1.020563176   | 0.000582277 | 0.540076934    | 0.070056961  | 0.999996572  | 0.045815122     | 0.99911736       |
| Fam53a        | 0  | 1      | 0       | -0.205290812 | 0.248132975 | -0.671529408  | 0.000238179 | 0.083199297    | 0.669375081  | 0.999996572  | 0.030129204     | 0.99911736       |
| Fam84b        | 0  | 1      | 0       | -0.075681358 | 0.571465361 | 0.583044058   | 0.0000782   | 0.16390905     | 0.234776086  | 0.999996572  | 0.0162491       | 0.99911736       |
| Fcgrt         | 0  | 1      | 0       | -0.055767196 | 0.735806467 | -0.580702088  | 0.000590841 | -0.161890886   | 0.341428064  | 0.999996572  | 0.046266525     | 0.99911736       |
| Fcrls         | 0  | 1      | 0       | -0.428828799 | 0.0185533   | -0.886488905  | 0.000       |                |              |              |                 |                  |

**Trem14** promotes inflammatory programs in human and murine macrophages and alters atherosclerosis lesion composition in the Apolipoprotein E deficient mouse

|              |   |   |   |              |             |              |             |              |             |             |             |             |
|--------------|---|---|---|--------------|-------------|--------------|-------------|--------------|-------------|-------------|-------------|-------------|
| Gm10521      | 0 | 1 | 0 | 0.007868133  | 0.98004914  | 2.116038189  | 2.24E-08    | 0.330470997  | 0.302301417 | 0.999996572 | 3.05E-05    | 0.99911736  |
| Gm10524      | 0 | 1 | 0 | 0.114156613  | 0.702042608 | 1.365481866  | 0.000243914 | 1.000695241  | 0.011786767 | 0.999996572 | 0.030129204 | 0.550152296 |
| Gm13340      | 0 | 1 | 0 | -0.297443893 | 0.214141361 | 0.883300564  | 0.000222682 | 0.283097176  | 0.236822465 | 0.999996572 | 0.029629379 | 0.99911736  |
| Gm14446      | 0 | 1 | 0 | -0.047261447 | 0.824565972 | 0.721204531  | 0.0000684   | -0.221939603 | 0.218763022 | 0.999996572 | 0.015334718 | 0.99911736  |
| Gm15989      | 0 | 1 | 0 | -2.171010503 | 0.01280363  | -3.312432402 | 0.000197724 | -3.004307987 | 0.001830281 | 0.999996572 | 0.027657701 | 0.208881531 |
| Gm20204      | 0 | 1 | 0 | -0.140903062 | 0.367889934 | 0.751396006  | 0.000304308 | 0.131983729  | 0.485932505 | 0.999996572 | 0.033650708 | 0.99911736  |
| Gm28439      | 0 | 1 | 0 | -0.380579535 | 0.283767456 | 1.265227035  | 0.000249866 | 0.482959907  | 0.16652294  | 0.999996572 | 0.030129204 | 0.99911736  |
| Gmfb         | 0 | 1 | 0 | 0.176937938  | 0.32815718  | 0.621613544  | 0.000601776 | 0.22355114   | 0.220943294 | 0.999996572 | 0.04652187  | 0.99911736  |
| Got1         | 0 | 1 | 0 | 0.005186056  | 0.9721802   | -0.547405546 | 0.000247667 | -0.396866561 | 0.007695351 | 0.999996572 | 0.030129204 | 0.444178354 |
| Gprc5c       | 0 | 1 | 0 | -0.360938777 | 0.082885147 | -0.92286943  | 0.0000407   | -0.575919996 | 0.046429206 | 0.999996572 | 0.011685898 | 0.960632598 |
| Gstm2        | 0 | 1 | 0 | -0.273590586 | 0.059502195 | -0.559121536 | 0.00027467  | -0.290544466 | 0.059996827 | 0.999996572 | 0.031217008 | 0.99911736  |
| H2afj        | 0 | 1 | 0 | -0.318369493 | 0.043736869 | -0.644079075 | 0.000112049 | -0.442916565 | 0.008653802 | 0.999996572 | 0.019303094 | 0.472093745 |
| Hccs         | 0 | 1 | 0 | 0.22495169   | 0.294069865 | 0.799654437  | 0.000402268 | 0.245074237  | 0.282469612 | 0.999996572 | 0.037922279 | 0.99911736  |
| Hmgb2        | 0 | 1 | 0 | 0.469117533  | 0.011204252 | 0.784971814  | 0.0000475   | 0.110110688  | 0.575614471 | 0.999996572 | 0.012670452 | 0.99911736  |
| Hmgcs1       | 0 | 1 | 0 | 0.058151904  | 0.661759234 | 0.557500677  | 0.0000435   | 0.183707827  | 0.182201521 | 0.999996572 | 0.011919903 | 0.99911736  |
| Hmmr         | 0 | 1 | 0 | 0.606711172  | 0.006990432 | 1.281387473  | 0.000129557 | 0.025320573  | 0.938898764 | 0.999996572 | 0.021025935 | 0.99911736  |
| Hnmt         | 0 | 1 | 0 | 0.32331761   | 0.104051407 | 0.790015288  | 0.000388444 | 0.514162615  | 0.025006626 | 0.999996572 | 0.037789094 | 0.775195285 |
| Htra4        | 0 | 1 | 0 | -0.471569774 | 0.025995852 | -0.748636961 | 0.0000538   | -0.545550777 | 0.004197116 | 0.999996572 | 0.013546012 | 0.325170829 |
| Ido1         | 0 | 1 | 0 | 1.268506662  | 0.044756466 | 0.67666963   | 0.00010102  | 0.182647509  | 0.291429037 | 0.999996572 | 0.01797058  | 0.99911736  |
| Ifitm2       | 0 | 1 | 0 | -0.203723029 | 0.245383946 | -0.682260996 | 0.0000958   | -0.425471739 | 0.015006042 | 0.999996572 | 0.017420698 | 0.624444772 |
| Ifitm3       | 0 | 1 | 0 | 0.017977171  | 0.906841732 | -0.563791045 | 0.000220316 | -0.354586835 | 0.020134878 | 0.999996572 | 0.02955485  | 0.730164761 |
| Impact       | 0 | 1 | 0 | 0.124440502  | 0.539370159 | 0.698688778  | 0.000715145 | 0.348980697  | 0.082586504 | 0.999996572 | 0.049593488 | 0.99911736  |
| Irf8         | 0 | 1 | 0 | -0.086899315 | 0.528459112 | -0.510679498 | 0.000200014 | -0.215901179 | 0.116443686 | 0.999996572 | 0.027740925 | 0.99911736  |
| Jade2        | 0 | 1 | 0 | -0.322926598 | 0.139285713 | -0.775638392 | 0.000411886 | -0.22281536  | 0.320083956 | 0.999996572 | 0.038519579 | 0.99911736  |
| Junb         | 0 | 1 | 0 | -0.304119356 | 0.047682667 | -0.546820437 | 0.000358352 | -0.491275307 | 0.001353956 | 0.999996572 | 0.036493435 | 0.168362621 |
| Jund         | 0 | 1 | 0 | -0.423813974 | 0.014167459 | -0.611780576 | 0.000393692 | -0.308806386 | 0.074195675 | 0.999996572 | 0.03790096  | 0.99911736  |
| Kdm6b        | 0 | 1 | 0 | -0.250751401 | 0.127494979 | -0.59289532  | 0.000210861 | -0.250065083 | 0.116904642 | 0.999996572 | 0.028757926 | 0.99911736  |
| Kif11        | 0 | 1 | 0 | 0.550221426  | 0.031648877 | 1.180165516  | 0.000262389 | 0.047118481  | 0.91050906  | 0.999996572 | 0.030905013 | 0.99911736  |
| Kilf         | 0 | 1 | 0 | 0.69438565   | 0.002446605 | 0.905631009  | 0.000014    | 0.678306509  | 0.001269269 | 0.999996572 | 0.006364556 | 0.161029895 |
| Ldhd         | 0 | 1 | 0 | -0.343899723 | 0.07002334  | -0.794663614 | 0.000337093 | -0.404044424 | 0.099001715 | 0.999996572 | 0.035592671 | 0.99911736  |
| Lgals9       | 0 | 1 | 0 | 0.238932705  | 0.063626185 | -0.522574234 | 0.0000363   | -0.202972032 | 0.108669225 | 0.999996572 | 0.011183433 | 0.99911736  |
| Lipo1        | 0 | 1 | 0 | 0.204191554  | 0.257353957 | 0.739337515  | 0.000048    | 0.183873963  | 0.309147733 | 0.999996572 | 0.012670452 | 0.99911736  |
| Lrrc4        | 0 | 1 | 0 | -0.884143934 | 0.196555851 | -0.576068692 | 0.00000184  | -0.348338863 | 0.00543935  | 0.999996572 | 0.00130928  | 0.374340756 |
| Lyz2         | 0 | 1 | 0 | -0.469639982 | 0.005060654 | -0.607842366 | 0.000285901 | -0.406150229 | 0.015357284 | 0.999996572 | 0.032048327 | 0.631999243 |
| Mag          | 0 | 1 | 0 | -0.143169808 | 0.431244545 | -0.670293816 | 0.000106914 | -0.306473627 | 0.082773471 | 0.999996572 | 0.01861441  | 0.99911736  |
| Man1a2       | 0 | 1 | 0 | 0.08855863   | 0.486157272 | 0.54594094   | 0.0000283   | 0.164338537  | 0.205412275 | 0.999996572 | 0.009394084 | 0.99911736  |
| Map4k3       | 0 | 1 | 0 | 0.091343683  | 0.573139901 | 0.589091344  | 0.000324098 | 0.288824361  | 0.076120122 | 0.999996572 | 0.034692818 | 0.99911736  |
| Mapkbp1      | 0 | 1 | 0 | -0.269493822 | 0.152550215 | -0.686082701 | 0.000242687 | -0.369616673 | 0.048608527 | 0.999996572 | 0.030129204 | 0.969419669 |
| Mmgt1        | 0 | 1 | 0 | 0.213892666  | 0.245255587 | 0.707081116  | 0.000603844 | 0.12692892   | 0.542473172 | 0.999996572 | 0.04652187  | 0.99911736  |
| Mmp25        | 0 | 1 | 0 | 0.211394743  | 0.284818917 | -0.536678127 | 0.0000156   | -0.450002804 | 0.000314878 | 0.999996572 | 0.0065464   | 0.066925888 |
| mmu-mir-5103 | 0 | 1 | 0 | 0.287019938  | 0.324532038 | 1.035215576  | 0.00070654  | 0.696472932  | 0.014874839 | 0.999996572 | 0.049453665 | 0.622612826 |
| Mob3a        | 0 | 1 | 0 | -0.062349933 | 0.675362384 | -0.542192044 | 0.000320448 | -0.159079395 | 0.289653131 | 0.999996572 | 0.034692818 | 0.99911736  |
| Mpp6         | 0 | 1 | 0 | 0.097522624  | 0.521923961 | 0.766237777  | 0.00000103  | 0.355100444  | 0.034503981 | 0.999996572 | 0.000842849 | 0.862711002 |
| Mpp7         | 0 | 1 | 0 | 0.889071188  | 0.000502954 | 1.033852703  | 0.0000639   | 0.311178932  | 0.22480551  | 0.999996572 | 0.014936856 | 0.99911736  |
| Mpst         | 0 | 1 | 0 | -0.017522491 | 0.898894427 | -0.05293044  | 0.000390221 | -0.297542535 | 0.043098429 | 0.999996572 | 0.037789094 | 0.939212901 |
| Msmo1        | 0 | 1 | 0 | -0.005547516 | 0.968463426 | 0.510231783  | 0.000431928 | 0.280938211  | 0.052144235 | 0.999996572 | 0.03936649  | 0.988127267 |
| mt-Co1       | 0 | 1 | 0 | -0.214518866 | 0.187390811 | 0.585028529  | 0.000323875 | 0.186169419  | 0.252566705 | 0.999996572 | 0.034692818 | 0.99911736  |
| Nt-ND4       | 0 | 1 | 0 | -0.174812657 | 0.376284351 | 0.692268099  | 0.000458526 | 0.170729023  | 0.387749145 | 0.999996572 | 0.039459882 | 0.99911736  |
| Myo18b       | 0 | 1 | 0 | 1.359679001  | 0.006248212 | -1.356585735 | 0.000354867 | -0.51836692  | 0.308962765 | 0.999996572 | 0.036493435 | 0.99911736  |
| Napb         | 0 | 1 | 0 | -0.023751196 | 0.932573208 | 1.169901786  | 0.0000886   | 0.492756462  | 0.064644265 | 0.999996572 | 0.016860786 | 0.99911736  |
| Ndrgr4       | 0 | 1 | 0 | 0.549158028  | 0.002904485 | 1.046755423  | 0.0000183   | 0.580003642  | 0.00752628  | 0.999996572 | 0.006806768 | 0.436791129 |
| Nek2         | 0 | 1 | 0 | 0.247230017  | 0.291828157 | 1.209633235  | 0.000526287 | 0.4432770097 | 0.221726284 | 0.999996572 | 0.034525212 | 0.99911736  |
| Nfix         | 0 | 1 | 0 | -0.258151183 | 0.409136608 | -1.161548961 | 0.000539849 | -0.769642505 | 0.025125416 | 0.999996572 | 0.043738459 | 0.775195285 |
| Nfkb2        | 0 | 1 | 0 | -0.090599918 | 0.648230305 | -0.711719617 | 0.000322879 | -0.329386943 | 0.096308981 | 0.999996572 | 0.034692818 | 0.99911736  |
| Nfkbib       | 0 | 1 | 0 | -0.089607598 | 0.572497499 | -0.581780984 | 0.000204936 | -0.297553372 | 0.057971457 | 0.999996572 | 0.028184728 | 0.99911736  |
| Nktr         | 0 | 1 | 0 | -0.02018562  | 0.924871592 | 0.863139019  | 0.0000549   | 0.150679934  | 0.479846979 | 0.999996572 | 0.013613536 | 0.99911736  |
| Nr4a1        | 0 | 1 | 0 | 0.005993486  | 0.97712798  | -0.737660512 | 0.00033218  | -0.663481597 | 0.00566676  | 0.999996572 | 0.035301675 | 0.38009096  |
| Nusap1       | 0 | 1 | 0 | 0.567437417  | 0.02562545  | 1.084035052  | 0.000104396 | 0.268379443  | 0.465210222 | 0.999996572 | 0.018371451 | 0.99911736  |
| Pdcd2        | 0 | 1 | 0 | 0.088804419  | 0.707675677 | -0.946333742 | 0.0000797   | -0.487244903 | 0.054651869 | 0.999996572 | 0.0162491   | 0.997061789 |
| Pde1b        | 0 | 1 | 0 | -0.284972866 | 0.212930907 | 0.809167924  | 0.000359003 | 0.25000517   | 0.270568517 | 0.999996572 | 0.036493435 | 0.99911736  |
| Pde7b        | 0 | 1 | 0 | 0.136730068  | 0.445251203 | 0.555525193  | 0.0000181   | 0.028989021  | 0.820351378 | 0.999996572 | 0.006806768 | 0.99911736  |
| Pdim4        | 0 | 1 | 0 | -0.203928505 | 0.147835077 | -0.637047768 | 0.00000795  | -0.44544981  | 0.001670273 | 0.999996572 | 0.004065928 | 0.196659625 |
| Pfkl         | 0 | 1 | 0 | -0.146773987 | 0.338346703 | -0.59930592  | 0.0000827   | -0.356255149 | 0.019093464 | 0.999996572 | 0.0162491   | 0.717353517 |
| Pgap1        | 0 | 1 | 0 | -0.008679677 | 0.946214888 | 0.640473161  | 0.0000228   | 0.430888399  | 0.001880652 | 0.999996572 | 0.008147422 | 0.210198001 |
| Pgp          | 0 | 1 | 0 | -0.058210099 | 0.720084598 | -0.653787814 | 0.00011605  | -0.395243293 | 0.016805663 | 0.999996572 | 0.019777383 | 0.669200683 |
| Pim3         | 0 | 1 | 0 | -0.165609321 | 0.445212545 | -0.756333863 | 0.000451257 | -0.471644889 | 0.027752377 | 0.999996572 | 0.039453725 | 0.806741389 |
| Pink1        | 0 | 1 | 0 | -0.240336188 | 0.084675139 | -0.600992719 | 0.000038    | -0.214589686 | 0.143694639 | 0.999996572 | 0.011307741 | 0.99911736  |
| Pla1a        | 0 | 1 | 0 | -0.66422637  | 0.454998535 | -1.095365993 | 0.000439335 | -1.005761522 | 0.001106038 | 0.999996572 | 0.03936649  | 0.145473708 |
| Pls3         | 0 | 1 | 0 | 0.522488414  | 0.002518985 | 0.665857398  | 0.00012591  | 0.725622367  | 0.000933382 | 0.999996572 | 0.020814576 | 0.13399763  |
| Pnpt1        | 0 | 1 | 0 | 0.276242004  | 0.099473457 | 0.558704082  | 0.000526579 | -0.016941536 | 0.916431775 | 0.999996572 | 0.043525212 | 0.99911736  |
| Ppp1r15a     | 0 | 1 | 0 | -0.049145821 | 0.74214791  | -0.54088525  | 0.000226395 | -0.214197506 | 0.145096364 | 0.999996572 | 0.029       |             |



**Trem14 promotes inflammatory programs in human and murine macrophages and alters atherosclerosis lesion composition in the Apolipoprotein E deficient mouse**

|               |   |   |   |              |             |              |             |              |             |             |             |             |
|---------------|---|---|---|--------------|-------------|--------------|-------------|--------------|-------------|-------------|-------------|-------------|
| Rilp12        | 0 | 1 | 0 | -0.012608398 | 0.936136581 | -0.645503797 | 0.0000424   | -0.108455824 | 0.492619418 | 0.999996572 | 0.011919903 | 0.99911736  |
| Rnd1          | 0 | 1 | 0 | 0.155831731  | 0.551923466 | -0.840655865 | 0.000440185 | -0.527739783 | 0.025767876 | 0.999996572 | 0.03936649  | 0.783860704 |
| Rnf128        | 0 | 1 | 0 | 0.021155322  | 0.870153541 | 0.562356394  | 0.0000178   | 0.307418539  | 0.018491082 | 0.999996572 | 0.006806768 | 0.703779181 |
| Rnf44         | 0 | 1 | 0 | -0.163815125 | 0.17293742  | -0.562846437 | 0.0000033   | -0.318464976 | 0.008496887 | 0.999996572 | 0.00192885  | 0.468215665 |
| RP23-13A13.6  | 0 | 1 | 0 | -0.3636166   | 0.377152191 | 0.556036101  | 0.000268912 | 0.407384649  | 0.346458585 | 0.999996572 | 0.030988849 | 0.99911736  |
| RP23-456B9.18 | 0 | 1 | 0 | -0.106806492 | 0.826355007 | 1.879284247  | 0.000631433 | -0.330843269 | 0.520956139 | 0.999996572 | 0.046849934 | 0.99911736  |
| RP24-443M8.2  | 0 | 1 | 0 | -0.122937968 | 0.585844153 | 0.844368687  | 0.000555307 | 0.433604981  | 0.0578146   | 0.999996572 | 0.04433246  | 0.99911736  |
| Rps6ka4       | 0 | 1 | 0 | -0.089945322 | 0.552096011 | -0.576757856 | 0.000129758 | -0.351218458 | 0.019815819 | 0.999996572 | 0.021025935 | 0.72937282  |
| Runx3         | 0 | 1 | 0 | -0.115684021 | 0.385137528 | -0.545680292 | 0.0000106   | -0.42257201  | 0.000630803 | 0.999996572 | 0.005150476 | 0.10753877  |
| Scand1        | 0 | 1 | 0 | -0.379412048 | 0.060655299 | -0.801775514 | 0.0000834   | -0.538551787 | 0.008912269 | 0.999996572 | 0.0162491   | 0.478441068 |
| Sdc4          | 0 | 1 | 0 | -0.143245112 | 0.244370548 | -0.526864537 | 0.0000133   | -0.404998915 | 0.000842188 | 0.999996572 | 0.00621908  | 0.127622674 |
| Serpinb6b     | 0 | 1 | 0 | 0.379698261  | 0.007668672 | 0.658077796  | 0.0000031   | 0.254755085  | 0.069789121 | 0.999996572 | 0.001927551 | 0.99911736  |
| Sgk3          | 0 | 1 | 0 | 0.078082759  | 0.60028859  | 0.573699841  | 0.000124331 | 0.047329907  | 0.751762828 | 0.999996572 | 0.020763277 | 0.99911736  |
| Sh3bp4        | 0 | 1 | 0 | -0.170272677 | 0.266714479 | -0.509609094 | 0.000453214 | -0.151134993 | 0.306158765 | 0.999996572 | 0.039453725 | 0.99911736  |
| Slc15a2       | 0 | 1 | 0 | 1.288090868  | 0.184137279 | 3.676997507  | 0.000145048 | 2.959949449  | 0.002312063 | 0.999996572 | 0.022825534 | 0.24099194  |
| Slc16a3       | 0 | 1 | 0 | -0.046769078 | 0.738474009 | -0.547784612 | 0.0000812   | -0.320031955 | 0.021173721 | 0.999996572 | 0.0162491   | 0.127464146 |
| Slc40a1       | 0 | 1 | 0 | 0.174191942  | 0.297770103 | 0.62083362   | 0.000244654 | 0.482919325  | 0.003991781 | 0.999996572 | 0.030129204 | 0.315601391 |
| Slc4a7        | 0 | 1 | 0 | 0.057345983  | 0.67336872  | 0.712896696  | 0.000000622 | 0.351541265  | 0.034287994 | 0.999996572 | 0.000535771 | 0.860670721 |
| Smapg         | 0 | 1 | 0 | -0.479576175 | 0.022401389 | -0.921540408 | 0.0000151   | -0.665291987 | 0.003337924 | 0.999996572 | 0.006503332 | 0.28604829  |
| Spp1          | 0 | 1 | 0 | 0.587068352  | 0.000301471 | 0.639317546  | 0.0000829   | 0.531154759  | 0.001077885 | 0.180992179 | 0.0162491   | 0.143420048 |
| Sptssa        | 0 | 1 | 0 | 0.069057414  | 0.671182004 | 0.698385895  | 0.0000796   | 0.378446955  | 0.030785464 | 0.999996572 | 0.0162491   | 0.825958859 |
| Ssbp4         | 0 | 1 | 0 | -0.225630665 | 0.137043221 | -0.742592718 | 0.00000119  | -0.41792707  | 0.006476525 | 0.999996572 | 0.000927407 | 0.394092854 |
| St18          | 0 | 1 | 0 | 0.144935757  | 0.470034737 | 0.781866303  | 0.00016811  | 0.314354497  | 0.136833817 | 0.999996572 | 0.024786381 | 0.99911736  |
| Stard9        | 0 | 1 | 0 | -0.1776379   | 0.356873921 | 0.781142957  | 0.000232823 | 0.681636126  | 0.000796662 | 0.999996572 | 0.030003002 | 0.123001607 |
| Stat5a        | 0 | 1 | 0 | -0.073826561 | 0.688065855 | -0.628631631 | 0.000609735 | -0.256553457 | 0.171537238 | 0.999996572 | 0.04652187  | 0.99911736  |
| Synpo         | 0 | 1 | 0 | 0.36036839   | 0.111282506 | -0.604821402 | 0.000446873 | -0.537612423 | 0.005066669 | 0.999996572 | 0.039453725 | 0.359557336 |
| Tbcl1d1       | 0 | 1 | 0 | -0.123039404 | 0.39005071  | -0.57131206  | 0.0000648   | -0.370833993 | 0.010130769 | 0.999996572 | 0.014936856 | 0.508670491 |
| Tgfb1r1       | 0 | 1 | 0 | 0.110047227  | 0.524488614 | 0.844160476  | 0.00000741  | 0.425223405  | 0.019585291 | 0.999996572 | 0.003912002 | 0.725187494 |
| Thbs1         | 0 | 1 | 0 | -0.361674229 | 0.065839644 | -0.737389658 | 0.0000994   | -0.70022536  | 0.000216944 | 0.999996572 | 0.017876708 | 0.05109021  |
| Tlr13         | 0 | 1 | 0 | -0.038903219 | 0.821883781 | 0.736689037  | 0.0000229   | 0.179366022  | 0.299958014 | 0.999996572 | 0.008147422 | 0.99911736  |
| Tlr4          | 0 | 1 | 0 | 0.089375186  | 0.639014137 | 0.842612068  | 0.0000107   | 0.400671942  | 0.036771603 | 0.999996572 | 0.005150476 | 0.882410637 |
| Tmem110       | 0 | 1 | 0 | -0.221173941 | 0.344249807 | -0.838940462 | 0.000284861 | -0.483160123 | 0.039954281 | 0.999996572 | 0.032048327 | 0.914533934 |
| Tpi1          | 0 | 1 | 0 | 0.130678146  | 0.321150098 | -0.502010309 | 0.000135945 | -0.286283698 | 0.029475798 | 0.999996572 | 0.021600737 | 0.823501586 |
| Ttc7          | 0 | 1 | 0 | -0.088764149 | 0.525841186 | -0.570476199 | 0.0000523   | -0.217084298 | 0.125154966 | 0.999996572 | 0.013374091 | 0.99911736  |
| Xkr8          | 0 | 1 | 0 | -0.19530555  | 0.277596629 | -0.58178155  | 0.000400775 | -0.383762123 | 0.020464487 | 0.999996572 | 0.037922279 | 0.730164761 |
| Zc3h7a        | 0 | 1 | 0 | 0.028828508  | 0.880364095 | 0.645093482  | 0.000655995 | 0.061773565  | 0.744590492 | 0.999996572 | 0.047925217 | 0.99911736  |
| Zdhhc2        | 0 | 1 | 0 | 0.999951763  | 0.002236492 | 0.688307808  | 0.00155296  | 0.566327344  | 0.016199846 | 0.725167985 | 0.023576435 | 0.654633777 |
| Zfand2b       | 0 | 1 | 0 | -0.009262204 | 0.952600275 | -0.557734703 | 0.00038287  | -0.311267431 | 0.048516798 | 0.999996572 | 0.037789094 | 0.969419669 |
| Zfp445        | 0 | 1 | 0 | 0.004136011  | 0.985871265 | 0.835558008  | 0.000458024 | 0.048333413  | 0.838404747 | 0.999996572 | 0.039495982 | 0.99911736  |
| Zfp451        | 0 | 1 | 0 | -0.026016012 | 0.876094672 | 0.67665174   | 0.000117219 | 0.113249891  | 0.498327201 | 0.999996572 | 0.019777383 | 0.99911736  |
| Zfp597        | 0 | 1 | 0 | 0.108205577  | 0.608073861 | 0.809722823  | 0.000173325 | 0.101610718  | 0.628531759 | 0.999996572 | 0.025327116 | 0.99911736  |
| Zmym6         | 0 | 1 | 0 | 0.104591869  | 0.650514712 | 0.926433964  | 0.000257771 | 0.392390095  | 0.09520649  | 0.999996572 | 0.029641445 | 0.99911736  |
| Adra1a        | 0 | 0 | 1 | 0.123525906  | 0.526677174 | 0.403848713  | 0.061095215 | 0.901168803  | 0.0000101   | 0.999996572 | 0.320895593 | 0.006122096 |
| Agap1         | 0 | 0 | 1 | -0.209099534 | 0.146711564 | 0.108944496  | 0.531545116 | 0.724742949  | 0.000180147 | 0.999996572 | 0.823794258 | 0.046798187 |
| Angptl2       | 0 | 0 | 1 | 0.055835207  | 0.766708115 | 0.523471517  | 0.006373483 | 0.817868165  | 0.0000183   | 0.999996572 | 0.122715792 | 0.009661219 |
| Appb2         | 0 | 0 | 1 | -0.083980288 | 0.610498176 | 0.511608597  | 0.003424317 | 0.677059768  | 0.0000813   | 0.999996572 | 0.096832721 | 0.0271542   |
| Arhgef18      | 0 | 0 | 1 | 0.334390742  | 0.144634579 | 0.831805815  | 0.00088348  | 0.907175296  | 0.000198617 | 0.999996572 | 0.054977314 | 0.049900678 |
| Bcl2l14       | 0 | 0 | 1 | 0.063960127  | 0.632960514 | -0.621484471 | 0.00124865  | -0.768497378 | 0.000139412 | 0.999996572 | 0.064250761 | 0.038671471 |
| Bsn           | 0 | 0 | 1 | 0.147232629  | 0.313325231 | 0.333665931  | 0.204272902 | 0.962458675  | 0.000015    | 0.999996572 | 0.55085357  | 0.008465172 |
| C77080        | 0 | 0 | 1 | 0.162200722  | 0.339738632 | 0.594595893  | 0.001861916 | 0.845373344  | 0.00000191  | 0.999996572 | 0.07356096  | 0.001420866 |
| Cacna1a       | 0 | 0 | 1 | -0.05676569  | 0.735603749 | 0.17136476   | 0.410752299 | 0.806794415  | 0.0000458   | 0.999996572 | 0.744378515 | 0.019555272 |
| Cacna1d       | 0 | 0 | 1 | -0.384525522 | 0.003449522 | -0.425754796 | 0.001066367 | -0.513621559 | 0.000064    | 0.910562533 | 0.06017987  | 0.024358698 |
| Ccl4          | 0 | 0 | 1 | -0.276104986 | 0.036874892 | -0.20776915  | 0.072584296 | -0.620380224 | 8.38E-08    | 0.999996572 | 0.36673514  | 8.57E-05    |
| Cd83          | 0 | 0 | 1 | -0.229357064 | 0.188894043 | -0.528830917 | 0.00135769  | -0.65598756  | 0.0000785   | 0.999996572 | 0.064727007 | 0.0271542   |
| Dio2          | 0 | 0 | 1 | 0.415640309  | 0.201692604 | 1.078086383  | 0.007550451 | 1.402340997  | 0.0000328   | 0.999996572 | 0.131039959 | 0.014911244 |
| Dock10        | 0 | 0 | 1 | -0.054888755 | 0.681644129 | 0.480562505  | 0.000356145 | 0.508762076  | 0.000201237 | 0.999996572 | 0.036493435 | 0.049900678 |
| Dusp2         | 0 | 0 | 1 | -0.214623479 | 0.420254035 | -0.622254567 | 0.006309316 | -0.965773829 | 0.0000812   | 0.999996572 | 0.121910585 | 0.0271542   |
| F3            | 0 | 0 | 1 | 0.215298593  | 0.557364915 | -0.411010191 | 0.033922173 | -0.784760448 | 0.000102861 | 0.999996572 | 0.246033848 | 0.0317627   |
| Gdpd1         | 0 | 0 | 1 | 0.018084075  | 0.904438855 | 0.194211493  | 0.217155829 | 0.657382921  | 0.0000466   | 0.999996572 | 0.566550661 | 0.019555272 |
| H2-Q7         | 0 | 0 | 1 | 0.006315004  | 0.983849284 | -0.826730911 | 0.00324051  | -1.128728493 | 0.00005     | 0.999996572 | 0.094199266 | 0.0204575   |
| Kcnj2         | 0 | 0 | 1 | 0.07249103   | 0.660471855 | 0.361779584  | 0.109793774 | 0.862658488  | 0.0000055   | 0.999996572 | 0.413391266 | 0.003750542 |
| Maoa          | 0 | 0 | 1 | 0.43382499   | 0.020572031 | 0.382862893  | 0.054162085 | 0.832119409  | 0.000122846 | 0.999996572 | 0.305766362 | 0.035901744 |
| Nav2          | 0 | 0 | 1 | -0.020932154 | 0.91574623  | -0.216172573 | 0.32004069  | 0.842980393  | 0.000068    | 0.999996572 | 0.672373034 | 0.025292909 |
| Pcdh7         | 0 | 0 | 1 | -0.003932802 | 0.980440674 | 0.420397323  | 0.009980025 | 0.643811586  | 0.000113661 | 0.999996572 | 0.144413238 | 0.03382138  |
| Pecam1        | 0 | 0 | 1 | 0.588030454  | 0.044299894 | -0.397248723 | 0.025118823 | -0.685832554 | 0.0000831   | 0.999996572 | 0.216287632 | 0.027200292 |
| Plxn2         | 0 | 0 | 1 | 0.030243016  | 0.848166501 | 0.459628351  | 0.127678319 | 1.509741743  | 7.86E-09    | 0.999996572 | 0.444724979 | 9.19E-06    |
| Plxnd1        | 0 | 0 | 1 | -0.140595651 | 0.281913348 | -0.083038942 | 0.551847708 | 0.538298972  | 0.0000797   | 0.999996572 | 0.836031575 | 0.0271542   |
| Rgcc          | 0 | 0 | 1 | -0.213897626 | 0.410972307 | -0.326014234 | 0.017543279 | -0.574403152 | 0.0000624   | 0.999996572 | 0.18523439  | 0.0243152   |
| Rhoc          | 0 | 0 | 1 | 0.28249173   | 0.166381542 | -0.536132315 | 0.001869813 | -0.642252473 | 0.000193649 | 0.999996572 | 0.07356096  | 0.04951968  |
| Sectm1a       | 0 | 0 | 1 | -0.395969155 | 0.402865906 | -0.139956202 | 0.419570768 | -0.66030394  | 0.000143043 | 0.999996572 | 0.750913278 | 0.038958861 |
| Selenbp1      | 0 | 0 | 1 | 0.010342819  | 0.948914768 | -0.467085248 | 0.012845721 | -0.663223002 | 0.0000367   | 0.999996572 |             |             |

*Trem14* promotes inflammatory programs in human and murine macrophages and alters atherosclerosis lesion composition in the Apolipoprotein E deficient mouse

### Supplemental table 4- Metascape results- M1 8hr DEG mouse

| GroupID          | Category                | Term       | Description                                           | LogP     | Log(q-value) | InTerm<br>InList | Symbols                                                                                                                                                                                                     |
|------------------|-------------------------|------------|-------------------------------------------------------|----------|--------------|------------------|-------------------------------------------------------------------------------------------------------------------------------------------------------------------------------------------------------------|
| <b>1_Summary</b> | KEGG Pathway            | mmu04380   | Osteoclast differentiation                            | -5.26389 | -1.10107     | 8/130            | Akt2,Junb,Jund,Nfkb2,Pira2,Relb,Tgfb1,Gm14548,Nr4a1,Rps6ka4,Map4k3,Impact,Pde1b,Prkdc,Synpo,Ndr4                                                                                                            |
| 1_Member         | KEGG Pathway            | mmu04380   | Osteoclast differentiation                            | -5.26389 | -1.10107     | 8/130            | Akt2,Junb,Jund,Nfkb2,Pira2,Relb,Tgfb1,Gm14548                                                                                                                                                               |
| 1_Member         | KEGG Pathway            | mmu04010   | MAPK signaling pathway                                | -3.24579 | -0.40333     | 8/252            | Akt2,Nr4a1,Jund,Nfkb2,Relb,Tgfb1,Rps6ka4,Map4k3                                                                                                                                                             |
| 1_Member         | GO Biological Processes | GO:0009314 | response to radiation                                 | -2.62053 | -0.22727     | 9/389            | Akt2,Impact,Junb,Jund,Pde1b,Prkdc,Synpo,Map4k3,Ndr4                                                                                                                                                         |
| <b>2_Summary</b> | GO Biological Processes | GO:0010623 | programmed cell death involved in cell development    | -5.00158 | -1.10107     | 4/19             | Dnase1l3,Kitl,Prkdc,Slc4a7                                                                                                                                                                                  |
| 2_Member         | GO Biological Processes | GO:0010623 | programmed cell death involved in cell development    | -5.00158 | -1.10107     | 4/19             | Dnase1l3,Kitl,Prkdc,Slc4a7                                                                                                                                                                                  |
| <b>3_Summary</b> | GO Biological Processes | GO:0031347 | regulation of defense response                        | -4.72691 | -1.10107     | 15/563           | Cd59a,Dnase1l3,Ido1,Lgals9,Gbp4,Prkdc,Nectin2,Stat5a,Tlr4,Mapkbp1,Calcr1,Hmgb2,Trem14,Cd300lf,Tlr13,Adam10,Relb,Thbs1,Dennd1b                                                                               |
| 3_Member         | GO Biological Processes | GO:0031347 | regulation of defense response                        | -4.72691 | -1.10107     | 15/563           | Cd59a,Dnase1l3,Ido1,Lgals9,Gbp4,Prkdc,Nectin2,Stat5a,Tlr4,Mapkbp1,Calcr1,Hmgb2,Trem14,Cd300lf,Tlr13                                                                                                         |
| 3_Member         | GO Biological Processes | GO:0045089 | positive regulation of innate immune response         | -4.64705 | -1.10107     | 9/206            | Lgals9,Prkdc,Nectin2,Stat5a,Tlr4,Hmgb2,Trem14,Cd300lf,Tlr13                                                                                                                                                 |
| 3_Member         | GO Biological Processes | GO:0002274 | myeloid leukocyte activation                          | -4.04491 | -0.87915     | 8/192            | Adam10,Dnase1l3,Lgals9,Nectin2,Relb,Thbs1,Tlr4,Cd300lf                                                                                                                                                      |
| 3_Member         | GO Biological Processes | GO:0045088 | regulation of innate immune response                  | -4.00926 | -0.87826     | 9/249            | Lgals9,Prkdc,Nectin2,Stat5a,Tlr4,Hmgb2,Trem14,Cd300lf,Tlr13                                                                                                                                                 |
| 3_Member         | GO Biological Processes | GO:0031349 | positive regulation of defense response               | -3.79679 | -0.69797     | 10/327           | Ido1,Lgals9,Prkdc,Nectin2,Stat5a,Tlr4,Hmgb2,Trem14,Cd300lf,Tlr13                                                                                                                                            |
| 3_Member         | GO Biological Processes | GO:0002755 | MyD88-dependent toll-like receptor signaling pathway  | -3.39381 | -0.40414     | 3/20             | Tlr4,Cd300lf,Tlr13                                                                                                                                                                                          |
| 3_Member         | GO Biological Processes | GO:0002224 | toll-like receptor signaling pathway                  | -3.20743 | -0.40333     | 5/93             | Lgals9,Tlr4,Trem14,Cd300lf,Tlr13                                                                                                                                                                            |
| 3_Member         | GO Biological Processes | GO:0002218 | activation of innate immune response                  | -3.2074  | -0.40333     | 6/141            | Lgals9,Prkdc,Tlr4,Trem14,Cd300lf,Tlr13                                                                                                                                                                      |
| 3_Member         | GO Biological Processes | GO:0002221 | pattern recognition receptor signaling pathway        | -2.6651  | -0.22727     | 5/123            | Lgals9,Tlr4,Trem14,Cd300lf,Tlr13                                                                                                                                                                            |
| 3_Member         | GO Biological Processes | GO:0002758 | innate immune response-activating signal transduction | -2.63458 | -0.22727     | 5/125            | Lgals9,Tlr4,Trem14,Cd300lf,Tlr13                                                                                                                                                                            |
| 3_Member         | GO Biological Processes | GO:0002697 | regulation of immune effector process                 | -2.53999 | -0.20985     | 9/400            | Cd59a,Dnase1l3,Lgals9,Gbp4,Prkdc,Nectin2,Stat5a,Tlr4,Trem14                                                                                                                                                 |
| 3_Member         | GO Biological Processes | GO:0050778 | positive regulation of immune response                | -2.19784 | -0.10699     | 12/710           | Cd59a,Ido1,Lgals9,Prkdc,Nectin2,Stat5a,Tlr4,Hmgb2,Trem14,Cd300lf,Tlr13,Dennd1b                                                                                                                              |
| <b>4_Summary</b> | GO Biological Processes | GO:0006954 | inflammatory response                                 | -4.66207 | -1.10107     | 16/641           | Cd59a,Dnase1l3,Ido1,Lgals9,Relb,Stat5a,Thbs1,Timp1,Tlr4,Ccr1,Calcr1,Rps6ka4,Hmgb2,Kdm6b,Mmp25,Tlr13,Gbp4,Mapkbp1,Rnf128,Runx3,Irf8,Hilpda,Dennd1b,Adam10,Akt2,Fabp7,Thbs4,Trem14,Cd80,Junb,Jund,Nfkbib,Got1 |
| 4_Member         | GO Biological Processes | GO:0006954 | inflammatory response                                 | -4.66207 | -1.10107     | 16/641           | Cd59a,Dnase1l3,Ido1,Lgals9,Relb,Stat5a,Thbs1,Timp1,Tlr4,Ccr1,Calcr1,Rps6ka4,Hmgb2,Kdm6b,Mmp25,Tlr13                                                                                                         |
| 4_Member         | GO Biological Processes | GO:0001818 | negative regulation of cytokine production            | -4.21557 | -0.94524     | 9/234            | Cd59a,Ido1,Lgals9,Gbp4,Relb,Thbs1,Tlr4,Mapkbp1,Rnf128                                                                                                                                                       |
| 4_Member         | GO Biological Processes | GO:0001816 | cytokine production                                   | -3.61065 | -0.56331     | 15/709           | Runx3,Cd59a,Irf8,Ido1,Lgals9,Gbp4,Relb,Stat5a,Thbs1,Tlr4,Mapkbp1,Rnf128,Hilpda,Hmgb2,Dennd1b                                                                                                                |
| 4_Member         | GO Biological Processes | GO:0032101 | regulation of response to external stimulus           | -3.60414 | -0.56331     | 15/710           | Adam10,Akt2,Fabp7,Cd59a,Dnase1l3,Ido1,Lgals9,Gbp4,Stat5a,Thbs1,Thbs4,Tlr4,Mapkbp1,Calcr1,Trem14                                                                                                             |
| 4_Member         | GO Biological Processes | GO:0032655 | regulation of interleukin-12 production               | -3.27167 | -0.40333     | 4/51             | Irf8,Ido1,Thbs1,Tlr4                                                                                                                                                                                        |

**Trem14 promotes inflammatory programs in human and murine macrophages and alters atherosclerosis lesion composition in the Apolipoprotein E deficient mouse**

|           |                         |            |                                                       |          |          |        |                                                                                                                                     |
|-----------|-------------------------|------------|-------------------------------------------------------|----------|----------|--------|-------------------------------------------------------------------------------------------------------------------------------------|
| 4_Member  | GO Biological Processes | GO:0032615 | interleukin-12 production                             | -3.14651 | -0.40333 | 4/55   | Irf8,Ido1,Thbs1,Tlr4                                                                                                                |
| 4_Member  | GO Biological Processes | GO:0001817 | regulation of cytokine production                     | -3.0585  | -0.38462 | 13/636 | Cd59a,Irf8,Ido1,Lgals9,Gbp4,Relb,Stat5a,Thbs1,Tlr4,Mapkbp1,Rnf128,Hilpda,Hmgb2                                                      |
| 4_Member  | GO Biological Processes | GO:0043032 | positive regulation of macrophage activation          | -3.04979 | -0.38462 | 3/26   | Lgals9,Thbs1,Tlr4                                                                                                                   |
| 4_Member  | GO Biological Processes | GO:0032496 | response to lipopolysaccharide                        | -2.96766 | -0.32478 | 9/346  | Cd80,Irf8,Ido1,Junb,Jund,Lgals9,Nfkbib,Tlr4,Hmgb2                                                                                   |
| 4_Member  | GO Biological Processes | GO:0032103 | positive regulation of response to external stimulus  | -2.90087 | -0.29938 | 8/285  | Adam10,Akt2,Ido1,Lgals9,Stat5a,Thbs1,Thbs4,Tlr4                                                                                     |
| 4_Member  | GO Biological Processes | GO:0002237 | response to molecule of bacterial origin              | -2.79941 | -0.27006 | 9/366  | Cd80,Irf8,Ido1,Junb,Jund,Lgals9,Nfkbib,Tlr4,Hmgb2                                                                                   |
| 4_Member  | GO Biological Processes | GO:0032735 | positive regulation of interleukin-12 production      | -2.70645 | -0.23966 | 3/34   | Irf8,Ido1,Tlr4                                                                                                                      |
| 4_Member  | GO Biological Processes | GO:0043030 | regulation of macrophage activation                   | -2.41305 | -0.17432 | 3/43   | Lgals9,Thbs1,Tlr4                                                                                                                   |
| 4_Member  | GO Biological Processes | GO:0032653 | regulation of interleukin-10 production               | -2.27807 | -0.11629 | 3/48   | Ido1,Lgals9,Tlr4                                                                                                                    |
| 4_Member  | KEGG Pathway            | mmu05144   | Malaria                                               | -2.25295 | -0.112   | 3/49   | Thbs1,Thbs4,Tlr4                                                                                                                    |
| 4_Member  | GO Biological Processes | GO:0042035 | regulation of cytokine biosynthetic process           | -2.1966  | -0.10699 | 4/100  | Stat5a,Thbs1,Tlr4,Rnf128                                                                                                            |
| 4_Member  | GO Biological Processes | GO:0032613 | interleukin-10 production                             | -2.1809  | -0.1003  | 3/52   | Ido1,Lgals9,Tlr4                                                                                                                    |
| 4_Member  | GO Biological Processes | GO:0050727 | regulation of inflammatory response                   | -2.08305 | -0.04773 | 7/311  | Cd59a,Dnase1l3,Ido1,Lgals9,Stat5a,Tlr4,Calcr1                                                                                       |
| 4_Member  | GO Biological Processes | GO:0009612 | response to mechanical stimulus                       | -2.04061 | -0.02112 | 5/173  | Got1,Junb,Jund,Thbs1,Tlr4                                                                                                           |
| 4_Member  | GO Biological Processes | GO:0042089 | cytokine biosynthetic process                         | -2.02619 | -0.01929 | 4/112  | Stat5a,Thbs1,Tlr4,Rnf128                                                                                                            |
| 5_Summary | GO Biological Processes | GO:0001936 | regulation of endothelial cell proliferation          | -4.38467 | -0.94524 | 7/126  | Cav2,Nr4a1,Stat5a,Tgfbf1,Thbs1,Thbs4,Hmgb2,Camk2b,Runx3,Pink1,St18,Fabp7,Ido1,Pdcd2,Prkdc,Tlr4,Kitl,Segk3,Sdc4,Timp1,Glipr2         |
| 5_Member  | GO Biological Processes | GO:0001936 | regulation of endothelial cell proliferation          | -4.38467 | -0.94524 | 7/126  | Cav2,Nr4a1,Stat5a,Tgfbf1,Thbs1,Thbs4,Hmgb2                                                                                          |
| 5_Member  | GO Biological Processes | GO:0001935 | endothelial cell proliferation                        | -4.09419 | -0.89064 | 7/140  | Cav2,Nr4a1,Stat5a,Tgfbf1,Thbs1,Thbs4,Hmgb2                                                                                          |
| 5_Member  | GO Biological Processes | GO:0001938 | positive regulation of endothelial cell proliferation | -3.34023 | -0.40333 | 5/87   | Cav2,Nr4a1,Stat5a,Thbs4,Hmgb2                                                                                                       |
| 5_Member  | GO Biological Processes | GO:2001235 | positive regulation of apoptotic signaling pathway    | -2.69907 | -0.23945 | 6/177  | Camk2b,Runx3,Tgfbf1,Thbs1,Pink1,St18                                                                                                |
| 5_Member  | GO Biological Processes | GO:0050673 | epithelial cell proliferation                         | -2.46245 | -0.19523 | 9/411  | Fabp7,Cav2,Runx3,Nr4a1,Stat5a,Tgfbf1,Thbs1,Thbs4,Hmgb2                                                                              |
| 5_Member  | GO Biological Processes | GO:0050678 | regulation of epithelial cell proliferation           | -2.37461 | -0.15934 | 8/347  | Cav2,Runx3,Nr4a1,Stat5a,Tgfbf1,Thbs1,Thbs4,Hmgb2                                                                                    |
| 5_Member  | GO Biological Processes | GO:0043065 | positive regulation of apoptotic process              | -2.29253 | -0.11629 | 11/603 | Camk2b,Runx3,Nr4a1,Ido1,Pdcd2,Prkdc,Tgfbf1,Thbs1,Tlr4,Pink1,St18                                                                    |
| 5_Member  | GO Biological Processes | GO:0043068 | positive regulation of programmed cell death          | -2.26112 | -0.112   | 11/609 | Camk2b,Runx3,Nr4a1,Ido1,Pdcd2,Prkdc,Tgfbf1,Thbs1,Tlr4,Pink1,St18                                                                    |
| 5_Member  | GO Biological Processes | GO:0097191 | extrinsic apoptotic signaling pathway                 | -2.16308 | -0.09156 | 6/228  | Runx3,Kitl,Tgfbf1,Thbs1,Hmgb2,Segk3                                                                                                 |
| 5_Member  | GO Biological Processes | GO:2001236 | regulation of extrinsic apoptotic signaling pathway   | -2.15723 | -0.09156 | 5/162  | Runx3,Tgfbf1,Thbs1,Hmgb2,Segk3                                                                                                      |
| 5_Member  | GO Biological Processes | GO:0001667 | ameboid-type cell migration                           | -2.07269 | -0.04259 | 8/391  | Nr4a1,Kitl,Stat5a,Sdc4,Tgfbf1,Thbs1,Timp1,Glipr2                                                                                    |
| 5_Member  | GO Biological Processes | GO:2001233 | regulation of apoptotic signaling pathway             | -2.01066 | -0.01499 | 8/401  | Camk2b,Runx3,Tgfbf1,Thbs1,Pink1,Hmgb2,Segk3,St18                                                                                    |
| 6_Summary | GO Biological Processes | GO:0060326 | cell chemotaxis                                       | -4.27562 | -0.94524 | 10/286 | Adam10,Ch25h,Nr4a1,Lgals9,Spp1,Thbs1,Thbs4,Ccr12,Hmgb2,Prex1,Akt2,Runx3,Celsr3,Flrt2,Hmmr,Sdc4,Stat5a,Edil3,Cav2,Kitl,Tgfbf1,Glipr2 |
| 6_Member  | GO Biological Processes | GO:0060326 | cell chemotaxis                                       | -4.27562 | -0.94524 | 10/286 | Adam10,Ch25h,Nr4a1,Lgals9,Spp1,Thbs1,Thbs4,Ccr12,Hmgb2,Prex1                                                                        |
| 6_Member  | GO Biological Processes | GO:0006935 | chemotaxis                                            | -4.20689 | -0.94524 | 14/553 | Adam10,Akt2,Runx3,Ch25h,Nr4a1,Lgals9,Spp1,Thbs1,Thbs4,Ccr12,Hmgb2,Celsr3,Prex1,Flrt2                                                |

**Trem14 promotes inflammatory programs in human and murine macrophages and alters atherosclerosis lesion composition in the Apolipoprotein E deficient mouse**

|           |                         |             |                                                       |          |          |        |                                                                                                                                                               |
|-----------|-------------------------|-------------|-------------------------------------------------------|----------|----------|--------|---------------------------------------------------------------------------------------------------------------------------------------------------------------|
| 6_Member  | GO Biological Processes | GO:0042330  | taxis                                                 | -4.19019 | -0.94524 | 14/555 | Adam10,Akt2,Runx3,Ch25h,Nr4a1,Lgals9,Spp1,Thbs1,Thbs4,Ccl12,Hmgb2,Celsr3,Prex1,Flrt2                                                                          |
| 6_Member  | KEGG Pathway            | mmu04512    | ECM-receptor interaction                              | -3.43469 | -0.4202  | 5/83   | Hmmr,Spp1,Sdc4,Thbs1,Thbs4                                                                                                                                    |
| 6_Member  | GO Biological Processes | GO:0030595  | leukocyte chemotaxis                                  | -3.12379 | -0.40333 | 7/202  | Adam10,Ch25h,Lgals9,Spp1,Thbs1,Thbs4,Prex1                                                                                                                    |
| 6_Member  | Reactome Gene Sets      | R-MMU-18679 | Signaling by PDGF                                     | -3.05911 | -0.38462 | 4/58   | Spp1,Stat5a,Thbs1,Thbs4                                                                                                                                       |
| 6_Member  | GO Biological Processes | GO:0010811  | positive regulation of cell-substrate adhesion        | -2.72793 | -0.25383 | 5/119  | Edil3,Spp1,Sdc4,Thbs1,Prex1                                                                                                                                   |
| 6_Member  | GO Biological Processes | GO:0040017  | positive regulation of locomotion                     | -2.61009 | -0.22727 | 11/547 | Adam10,Akt2,Cav2,Lgals9,Kitl,Stat5a,Tgfb1,Thbs1,Thbs4,Prex1,Glipr2                                                                                            |
| 6_Member  | GO Biological Processes | GO:0050900  | leukocyte migration                                   | -2.59546 | -0.22727 | 8/319  | Adam10,Ch25h,Lgals9,Kitl,Spp1,Thbs1,Thbs4,Prex1                                                                                                               |
| 6_Member  | GO Biological Processes | GO:0002687  | positive regulation of leukocyte migration            | -2.56075 | -0.20985 | 5/130  | Adam10,Lgals9,Kitl,Thbs1,Thbs4                                                                                                                                |
| 6_Member  | GO Biological Processes | GO:0030335  | positive regulation of cell migration                 | -2.41924 | -0.17432 | 10/497 | Adam10,Akt2,Lgals9,Kitl,Stat5a,Tgfb1,Thbs1,Thbs4,Prex1,Glipr2                                                                                                 |
| 6_Member  | GO Biological Processes | GO:2000147  | positive regulation of cell motility                  | -2.31196 | -0.12772 | 10/515 | Adam10,Akt2,Lgals9,Kitl,Stat5a,Tgfb1,Thbs1,Thbs4,Prex1,Glipr2                                                                                                 |
| 6_Member  | GO Biological Processes | GO:0048247  | lymphocyte chemotaxis                                 | -2.25295 | -0.112   | 3/49   | Adam10,Ch25h,Lgals9                                                                                                                                           |
| 6_Member  | GO Biological Processes | GO:0051272  | positive regulation of cellular component movement    | -2.22111 | -0.10995 | 10/531 | Adam10,Akt2,Lgals9,Kitl,Stat5a,Tgfb1,Thbs1,Thbs4,Prex1,Glipr2                                                                                                 |
| 6_Member  | GO Biological Processes | GO:0002688  | regulation of leukocyte chemotaxis                    | -2.15181 | -0.09156 | 4/103  | Adam10,Lgals9,Thbs1,Thbs4                                                                                                                                     |
| 6_Member  | GO Biological Processes | GO:0002685  | regulation of leukocyte migration                     | -2.00048 | -0.00839 | 5/177  | Adam10,Lgals9,Kitl,Thbs1,Thbs4                                                                                                                                |
| 7_Summary | GO Biological Processes | GO:0002683  | negative regulation of immune system process          | -3.34443 | -0.40333 | 11/443 | Runx3,Cd59a,Cd80,Ido1,Lgals9,Kitl,Prkdc,Stat5a,Sdc4,Thbs1,Cd300lf,Adam10,Rnd1,Tlr4,Edil3,Spp1,Prex1,Cav2,Tgfb1,Ifitm3,Sh3bp4,Ndr4,St18,Mag,Nectin2,Lrrc4,Relb |
| 7_Member  | GO Biological Processes | GO:0002683  | negative regulation of immune system process          | -3.34443 | -0.40333 | 11/443 | Runx3,Cd59a,Cd80,Ido1,Lgals9,Kitl,Prkdc,Stat5a,Sdc4,Thbs1,Cd300lf                                                                                             |
| 7_Member  | GO Biological Processes | GO:0007162  | negative regulation of cell adhesion                  | -3.06139 | -0.38462 | 8/269  | Adam10,Runx3,Cd80,Ido1,Lgals9,Sdc4,Thbs1,Rnd1                                                                                                                 |
| 7_Member  | GO Biological Processes | GO:0050868  | negative regulation of T cell activation              | -2.7767  | -0.27006 | 5/116  | Runx3,Cd80,Ido1,Lgals9,Sdc4                                                                                                                                   |
| 7_Member  | GO Biological Processes | GO:0002695  | negative regulation of leukocyte activation           | -2.77464 | -0.27006 | 6/171  | Runx3,Cd80,Ido1,Lgals9,Sdc4,Cd300lf                                                                                                                           |
| 7_Member  | GO Biological Processes | GO:0070663  | regulation of leukocyte proliferation                 | -2.76563 | -0.26888 | 7/233  | Cd80,Ido1,Lgals9,Kitl,Stat5a,Sdc4,Tlr4                                                                                                                        |
| 7_Member  | GO Biological Processes | GO:0042130  | negative regulation of T cell proliferation           | -2.75404 | -0.26497 | 4/70   | Cd80,Ido1,Lgals9,Sdc4                                                                                                                                         |
| 7_Member  | GO Biological Processes | GO:1903038  | negative regulation of leukocyte cell-cell adhesion   | -2.64976 | -0.22727 | 5/124  | Runx3,Cd80,Ido1,Lgals9,Sdc4                                                                                                                                   |
| 7_Member  | GO Biological Processes | GO:0045785  | positive regulation of cell adhesion                  | -2.61308 | -0.22727 | 9/390  | Runx3,Cd80,Edil3,Lgals9,Spp1,Stat5a,Sdc4,Thbs1,Prex1                                                                                                          |
| 7_Member  | GO Biological Processes | GO:0050866  | negative regulation of cell activation                | -2.53432 | -0.20985 | 6/191  | Runx3,Cd80,Ido1,Lgals9,Sdc4,Cd300lf                                                                                                                           |
| 7_Member  | GO Biological Processes | GO:0030155  | regulation of cell adhesion                           | -2.53052 | -0.20985 | 12/644 | Adam10,Runx3,Cd80,Edil3,Ido1,Lgals9,Spp1,Stat5a,Sdc4,Thbs1,Rnd1,Prex1                                                                                         |
| 7_Member  | GO Biological Processes | GO:0032945  | negative regulation of mononuclear cell proliferation | -2.48409 | -0.19819 | 4/83   | Cd80,Ido1,Lgals9,Sdc4                                                                                                                                         |
| 7_Member  | GO Biological Processes | GO:0050672  | negative regulation of lymphocyte proliferation       | -2.48409 | -0.19819 | 4/83   | Cd80,Ido1,Lgals9,Sdc4                                                                                                                                         |
| 7_Member  | GO Biological Processes | GO:0070664  | negative regulation of leukocyte proliferation        | -2.41066 | -0.17432 | 4/87   | Cd80,Ido1,Lgals9,Sdc4                                                                                                                                         |
| 7_Member  | GO Biological Processes | GO:0008285  | negative regulation of cell proliferation             | -2.39857 | -0.16647 | 12/669 | Cav2,Runx3,Cd80,Ido1,Lgals9,Sdc4,Tgfb1,Thbs1,Ifitm3,Sh3bp4,Ndr4,St18                                                                                          |
| 7_Member  | GO Biological Processes | GO:0051250  | negative regulation of lymphocyte activation          | -2.33306 | -0.13823 | 5/147  | Runx3,Cd80,Ido1,Lgals9,Sdc4                                                                                                                                   |
| 7_Member  | GO Biological Processes | GO:0050670  | regulation of lymphocyte proliferation                | -2.21786 | -0.10995 | 6/222  | Cd80,Ido1,Lgals9,Stat5a,Sdc4,Tlr4                                                                                                                             |
| 7_Member  | GO Biological Processes | GO:0032944  | regulation of mononuclear cell proliferation          | -2.19939 | -0.10699 | 6/224  | Cd80,Ido1,Lgals9,Stat5a,Sdc4,Tlr4                                                                                                                             |

**Trem14** promotes inflammatory programs in human and murine macrophages and alters atherosclerosis lesion composition in the Apolipoprotein E deficient mouse

|            |                         |             |                                                                          |          |          |        |                                                                                                             |
|------------|-------------------------|-------------|--------------------------------------------------------------------------|----------|----------|--------|-------------------------------------------------------------------------------------------------------------|
| 7_Member   | GO Biological Processes | GO:0042129  | regulation of T cell proliferation                                       | -2.09244 | -0.05161 | 5/168  | Cd80,Ido1,Lgals9,Stat5a,Sdc4                                                                                |
| 7_Member   | KEGG Pathway            | mmu04514    | Cell adhesion molecules (CAMs)                                           | -2.08192 | -0.04773 | 5/169  | Cd80,Mag,Nectin2,Sdc4,Lrrc4                                                                                 |
| 7_Member   | GO Biological Processes | GO:0070661  | leukocyte proliferation                                                  | -2.03307 | -0.02112 | 7/318  | Cd80,Ido1,Lgals9,Kitl,Stat5a,Sdc4,Tlr4                                                                      |
| 7_Member   | GO Biological Processes | GO:0042110  | T cell activation                                                        | -2.01868 | -0.01499 | 9/483  | Runx3,Cd80,Ido1,Lgals9,Prkdc,Relb,Stat5a,Sdc4,Prex1                                                         |
| 7_Member   | GO Biological Processes | GO:0022408  | negative regulation of cell-cell adhesion                                | -2.0104  | -0.01499 | 5/176  | Runx3,Cd80,Ido1,Lgals9,Sdc4                                                                                 |
| 8_Summary  | GO Biological Processes | GO:1905952  | regulation of lipid localization                                         | -3.22367 | -0.40333 | 6/140  | Akt2,Ehd1,Lipg,Spp1,Thbs1,Hilpda,Cav2,Stat5a,Abca5,Pink1,Slc16a3,Pgap1                                      |
| 8_Member   | GO Biological Processes | GO:1905952  | regulation of lipid localization                                         | -3.22367 | -0.40333 | 6/140  | Akt2,Ehd1,Lipg,Spp1,Thbs1,Hilpda                                                                            |
| 8_Member   | GO Biological Processes | GO:0010876  | lipid localization                                                       | -2.84857 | -0.28538 | 9/360  | Akt2,Cav2,Ehd1,Lipg,Spp1,Stat5a,Thbs1,Hilpda,Abca5                                                          |
| 8_Member   | GO Biological Processes | GO:1905954  | positive regulation of lipid localization                                | -2.42865 | -0.17432 | 4/86   | Ehd1,Lipg,Spp1,Hilpda                                                                                       |
| 8_Member   | GO Biological Processes | GO:0015850  | organic hydroxy compound transport                                       | -2.19024 | -0.10365 | 6/225  | Lipg,Spp1,Pink1,Slc16a3,Abca5,Pgap1                                                                         |
| 8_Member   | GO Biological Processes | GO:0032368  | regulation of lipid transport                                            | -2.05304 | -0.02821 | 4/110  | Akt2,Lipg,Spp1,Thbs1                                                                                        |
| 8_Member   | GO Biological Processes | GO:0097006  | regulation of plasma lipoprotein particle levels                         | -2.00952 | -0.01499 | 3/60   | Ehd1,Lipg,Abca5                                                                                             |
| 9_Summary  | GO Biological Processes | GO:0046718  | viral entry into host cell                                               | -3.20778 | -0.40333 | 4/53   | Cav2,Nectin2,Ifitm3,Ifitm2,Irf8,Lgals9,Gbp4,Timp1,Mapkbp1,Trem14,Cd207,Tlr13,Ifit1bl1,Lyz2,Tlr4,Hmgb2,Pnpt1 |
| 9_Member   | GO Biological Processes | GO:0046718  | viral entry into host cell                                               | -3.20778 | -0.40333 | 4/53   | Cav2,Nectin2,Ifitm3,Ifitm2                                                                                  |
| 9_Member   | GO Biological Processes | GO:0043900  | regulation of multi-organism process                                     | -3.19315 | -0.40333 | 10/390 | Cav2,Irf8,Lgals9,Gbp4,Nectin2,Timp1,Mapkbp1,Ifitm3,Ifitm2,Trem14                                            |
| 9_Member   | GO Biological Processes | GO:0009615  | response to virus                                                        | -3.15712 | -0.40333 | 8/260  | Lgals9,Gbp4,Ifitm3,Ifitm2,Trem14,Cd207,Tlr13,Ifit1bl1                                                       |
| 9_Member   | GO Biological Processes | GO:0030260  | entry into host cell                                                     | -3.1168  | -0.40333 | 4/56   | Cav2,Nectin2,Ifitm3,Ifitm2                                                                                  |
| 9_Member   | GO Biological Processes | GO:0044409  | entry into host                                                          | -3.1168  | -0.40333 | 4/56   | Cav2,Nectin2,Ifitm3,Ifitm2                                                                                  |
| 9_Member   | GO Biological Processes | GO:0051806  | entry into cell of other organism involved in symbiotic interaction      | -3.1168  | -0.40333 | 4/56   | Cav2,Nectin2,Ifitm3,Ifitm2                                                                                  |
| 9_Member   | GO Biological Processes | GO:0051828  | entry into other organism involved in symbiotic interaction              | -3.1168  | -0.40333 | 4/56   | Cav2,Nectin2,Ifitm3,Ifitm2                                                                                  |
| 9_Member   | GO Biological Processes | GO:0046596  | regulation of viral entry into host cell                                 | -2.74424 | -0.26272 | 3/33   | Nectin2,Ifitm3,Ifitm2                                                                                       |
| 9_Member   | GO Biological Processes | GO:0098542  | defense response to other organism                                       | -2.53052 | -0.20985 | 12/644 | Irf8,Lgals9,Lyz2,Gbp4,Tlr4,Mapkbp1,Ifitm3,Ifitm2,Hmgb2,Trem14,Cd207,Ifit1bl1                                |
| 9_Member   | GO Biological Processes | GO:0034341  | response to interferon-gamma                                             | -2.50409 | -0.19866 | 5/134  | Irf8,Gbp4,Tlr4,Ifitm3,Ifitm2                                                                                |
| 9_Member   | GO Biological Processes | GO:0002831  | regulation of response to biotic stimulus                                | -2.43603 | -0.17432 | 5/139  | Lgals9,Gbp4,Nectin2,Mapkbp1,Trem14                                                                          |
| 9_Member   | GO Biological Processes | GO:0051607  | defense response to virus                                                | -2.28421 | -0.11629 | 6/215  | Gbp4,Ifitm3,Ifitm2,Trem14,Cd207,Ifit1bl1                                                                    |
| 9_Member   | GO Biological Processes | GO:0035456  | response to interferon-beta                                              | -2.25295 | -0.112   | 3/49   | Ifitm3,Pnpt1,Ifitm2                                                                                         |
| 9_Member   | Reactome Gene Sets      | R-MMU-19893 | Immunoregulatory interactions between a Lymphoid and a non-Lymphoid cell | -2.15181 | -0.09156 | 4/103  | Nectin2,Ifitm3,Ifitm2,Trem14                                                                                |
| 10_Summary | GO Biological Processes | GO:0032233  | positive regulation of actin filament bundle assembly                    | -3.0036  | -0.34972 | 4/60   | Sdc4,Tgfb1,Pdlim4,Synpo,Pls3,Rnd1,Gmfb,Prex1                                                                |
| 10_Member  | GO Biological Processes | GO:0032233  | positive regulation of actin filament bundle assembly                    | -3.0036  | -0.34972 | 4/60   | Sdc4,Tgfb1,Pdlim4,Synpo                                                                                     |
| 10_Member  | GO Biological Processes | GO:0051017  | actin filament bundle assembly                                           | -2.88058 | -0.28884 | 6/163  | Sdc4,Tgfb1,Pdlim4,Pls3,Synpo,Rnd1                                                                           |
| 10_Member  | GO Biological Processes | GO:0061572  | actin filament bundle organization                                       | -2.84013 | -0.28538 | 6/166  | Sdc4,Tgfb1,Pdlim4,Pls3,Synpo,Rnd1                                                                           |

**Trem14 promotes inflammatory programs in human and murine macrophages and alters atherosclerosis lesion composition in the Apolipoprotein E deficient mouse**

|            |                         |            |                                                                                                 |          |          |        |                                                                                  |
|------------|-------------------------|------------|-------------------------------------------------------------------------------------------------|----------|----------|--------|----------------------------------------------------------------------------------|
| 10_Member  | GO Biological Processes | GO:0051492 | regulation of stress fiber assembly                                                             | -2.46536 | -0.19523 | 4/84   | Sdc4,Tgfb1,Pdlim4,Synpo                                                          |
| 10_Member  | GO Biological Processes | GO:0110020 | regulation of actomyosin structure organization                                                 | -2.27487 | -0.11629 | 4/95   | Sdc4,Tgfb1,Pdlim4,Synpo                                                          |
| 10_Member  | GO Biological Processes | GO:0051496 | positive regulation of stress fiber assembly                                                    | -2.2284  | -0.10995 | 3/50   | Sdc4,Tgfb1,Pdlim4                                                                |
| 10_Member  | GO Biological Processes | GO:0030038 | contractile actin filament bundle assembly                                                      | -2.22735 | -0.10995 | 4/98   | Sdc4,Tgfb1,Pdlim4,Synpo                                                          |
| 10_Member  | GO Biological Processes | GO:0043149 | stress fiber assembly                                                                           | -2.22735 | -0.10995 | 4/98   | Sdc4,Tgfb1,Pdlim4,Synpo                                                          |
| 10_Member  | GO Biological Processes | GO:0032231 | regulation of actin filament bundle assembly                                                    | -2.21188 | -0.10995 | 4/99   | Sdc4,Tgfb1,Pdlim4,Synpo                                                          |
| 10_Member  | GO Biological Processes | GO:0007015 | actin filament organization                                                                     | -2.03521 | -0.02112 | 8/397  | Sdc4,Tgfb1,Pdlim4,Gmfb,Pls3,Synpo,Rnd1,Prex1                                     |
| 11_Summary | GO Biological Processes | GO:0051345 | positive regulation of hydrolase activity                                                       | -2.95034 | -0.32089 | 11/495 | Akt2,Camk2b,Cav2,Ppp1r15a,Pdcd2,Tbc1d1,Pin k1,Hmgb2,St18,Prex1,Dennd1b           |
| 11_Member  | GO Biological Processes | GO:0051345 | positive regulation of hydrolase activity                                                       | -2.95034 | -0.32089 | 11/495 | Akt2,Camk2b,Cav2,Ppp1r15a,Pdcd2,Tbc1d1,Pin k1,Hmgb2,St18,Prex1,Dennd1b           |
| 12_Summary | KEGG Pathway            | mmu04066   | HIF-1 signaling pathway                                                                         | -2.93237 | -0.32089 | 5/107  | Akt2,Camk2b,Pfkl,Timp1,Tlr4,Nr4a1,Kitl,Spp1,Thbs1,Thbs4,Sgk3,Cav2,Sdc4,Cd80,Ldhd |
| 12_Member  | KEGG Pathway            | mmu04066   | HIF-1 signaling pathway                                                                         | -2.93237 | -0.32089 | 5/107  | Akt2,Camk2b,Pfkl,Timp1,Tlr4                                                      |
| 12_Member  | KEGG Pathway            | mmu04151   | PI3K-Akt signaling pathway                                                                      | -2.38208 | -0.15934 | 8/346  | Akt2,Nr4a1,Kitl,Spp1,Thbs1,Thbs4,Tlr4,Sgk3                                       |
| 12_Member  | KEGG Pathway            | mmu05205   | Proteoglycans in cancer                                                                         | -2.37369 | -0.15934 | 6/206  | Akt2,Camk2b,Cav2,Sdc4,Thbs1,Tlr4                                                 |
| 12_Member  | KEGG Pathway            | mmu04620   | Toll-like receptor signaling pathway                                                            | -2.21188 | -0.10995 | 4/99   | Akt2,Cd80,Spp1,Tlr4                                                              |
| 12_Member  | KEGG Pathway            | mmu04922   | Glucagon signaling pathway                                                                      | -2.16657 | -0.09156 | 4/102  | Akt2,Camk2b,Ldhd,Pfkl                                                            |
| 13_Summary | GO Biological Processes | GO:0090100 | positive regulation of transmembrane receptor protein serine/threonine kinase signaling pathway | -2.93237 | -0.32089 | 5/107  | Gdf3,Got1,Lgals9,Tgfb1,Thbs1,Cav2,Zfp451,Runx3,Cd59a,Ehd1,Nr4a1,Ier2,Flrt2,Jade2 |
| 13_Member  | GO Biological Processes | GO:0090100 | positive regulation of transmembrane receptor protein serine/threonine kinase signaling pathway | -2.93237 | -0.32089 | 5/107  | Gdf3,Got1,Lgals9,Tgfb1,Thbs1                                                     |
| 13_Member  | GO Biological Processes | GO:0090092 | regulation of transmembrane receptor protein serine/threonine kinase signaling pathway          | -2.86321 | -0.28538 | 7/224  | Cav2,Gdf3,Got1,Lgals9,Tgfb1,Thbs1,Zfp451                                         |
| 13_Member  | GO Biological Processes | GO:0070848 | response to growth factor                                                                       | -2.7764  | -0.27006 | 12/601 | Cav2,Runx3,Cd59a,Ehd1,Gdf3,Got1,Nr4a1,Ier2,Tgfb1,Thbs1,Zfp451,Flrt2              |
| 13_Member  | GO Biological Processes | GO:0090288 | negative regulation of cellular response to growth factor stimulus                              | -2.4765  | -0.19553 | 5/136  | Cav2,Cd59a,Gdf3,Thbs1,Zfp451                                                     |
| 13_Member  | GO Biological Processes | GO:0001937 | negative regulation of endothelial cell proliferation                                           | -2.47199 | -0.19553 | 3/41   | Cav2,Tgfb1,Thbs1                                                                 |
| 13_Member  | GO Biological Processes | GO:0071559 | response to transforming growth factor beta                                                     | -2.41505 | -0.17432 | 6/202  | Cav2,Runx3,Got1,Tgfb1,Thbs1,Zfp451                                               |
| 13_Member  | GO Biological Processes | GO:0007178 | transmembrane receptor protein serine/threonine kinase signaling pathway                        | -2.37461 | -0.15934 | 8/347  | Cav2,Gdf3,Got1,Lgals9,Tgfb1,Thbs1,Jade2,Zfp451                                   |
| 13_Member  | GO Biological Processes | GO:0017015 | regulation of transforming growth factor beta receptor signaling pathway                        | -2.243   | -0.112   | 4/97   | Cav2,Got1,Thbs1,Zfp451                                                           |
| 13_Member  | GO Biological Processes | GO:1903844 | regulation of cellular response to transforming growth factor beta stimulus                     | -2.21188 | -0.10995 | 4/99   | Cav2,Got1,Thbs1,Zfp451                                                           |
| 13_Member  | GO Biological Processes | GO:0007179 | transforming growth factor beta receptor signaling pathway                                      | -2.20211 | -0.10699 | 5/158  | Cav2,Got1,Tgfb1,Thbs1,Zfp451                                                     |
| 14_Summary | KEGG Pathway            | mmu00010   | Glycolysis / Gluconeogenesis                                                                    | -2.84873 | -0.28538 | 4/66   | Aldh2,Ldhd,Pfkl,Tpi1,Cbr2,Got1,Gstm2,Stat5a,Pin k1,Hmgcs1                        |
| 14_Member  | KEGG Pathway            | mmu00010   | Glycolysis / Gluconeogenesis                                                                    | -2.84873 | -0.28538 | 4/66   | Aldh2,Ldhd,Pfkl,Tpi1                                                             |



**Trem14** promotes inflammatory programs in human and murine macrophages and alters atherosclerosis lesion composition in the Apolipoprotein E deficient mouse

|            |                         |             |                                                              |          |          |        |                                                                                                     |
|------------|-------------------------|-------------|--------------------------------------------------------------|----------|----------|--------|-----------------------------------------------------------------------------------------------------|
| 14_Member  | GO Biological Processes | GO:0051186  | cofactor metabolic process                                   | -2.03522 | -0.02112 | 9/480  | Cbr2,Got1,Gstm2,Ldhb,Pfkf,Stat5a,Tpi1,Pink1,Hmgcs1                                                  |
| 15_Summary | GO Biological Processes | GO:0006897  | endocytosis                                                  | -2.8037  | -0.27006 | 13/679 | Cav2,Ehd1,Irf8,Napb,Rab4a,Thbs1,Calcrl,Ifitm3,Sh3bp4,Trem14,Cd300lf,Dennd1b,Xkr8,Relb               |
| 15_Member  | GO Biological Processes | GO:0006897  | endocytosis                                                  | -2.8037  | -0.27006 | 13/679 | Cav2,Ehd1,Irf8,Napb,Rab4a,Thbs1,Calcrl,Ifitm3,Sh3bp4,Trem14,Cd300lf,Dennd1b,Xkr8                    |
| 15_Member  | GO Biological Processes | GO:0043277  | apoptotic cell clearance                                     | -2.53419 | -0.20985 | 3/39   | Thbs1,Cd300lf,Xkr8                                                                                  |
| 15_Member  | GO Biological Processes | GO:0098657  | import into cell                                             | -2.34626 | -0.14271 | 13/768 | Cav2,Ehd1,Irf8,Napb,Rab4a,Thbs1,Calcrl,Ifitm3,Sh3bp4,Trem14,Cd300lf,Dennd1b,Xkr8                    |
| 15_Member  | GO Biological Processes | GO:0019882  | antigen processing and presentation                          | -2.1228  | -0.07925 | 4/105  | Rab4a,Relb,Thbs1,Trem14                                                                             |
| 16_Summary | GO Biological Processes | GO:0018105  | peptidyl-serine phosphorylation                              | -2.77874 | -0.27006 | 8/298  | Akt2,Camk2b,Ppp1r15a,Prkdc,Tgfbf1,Rps6ka4,Pink1,Sgk3,Nek2,Sdc4,Pdlim4,Gmfb,Synpo,Nusap1,Impact,Pim3 |
| 16_Member  | GO Biological Processes | GO:0018105  | peptidyl-serine phosphorylation                              | -2.77874 | -0.27006 | 8/298  | Akt2,Camk2b,Ppp1r15a,Prkdc,Tgfbf1,Rps6ka4,Pink1,Sgk3                                                |
| 16_Member  | GO Biological Processes | GO:0018209  | peptidyl-serine modification                                 | -2.59546 | -0.22727 | 8/319  | Akt2,Camk2b,Ppp1r15a,Prkdc,Tgfbf1,Rps6ka4,Pink1,Sgk3                                                |
| 16_Member  | GO Biological Processes | GO:0010638  | positive regulation of organelle organization                | -2.48559 | -0.19819 | 11/568 | Akt2,Camk2b,Nek2,Sdc4,Tgfbf1,Pdlim4,Rps6ka4,Gmfb,Pink1,Synpo,Nusap1                                 |
| 16_Member  | GO Biological Processes | GO:0046777  | protein autophosphorylation                                  | -2.04225 | -0.02112 | 6/242  | Camk2b,Impact,Nek2,Tgfbf1,Pink1,Pim3                                                                |
| 17_Summary | GO Biological Processes | GO:1903959  | regulation of anion transmembrane transport                  | -2.66986 | -0.22727 | 3/35   | Akt2,Thbs1,Tcaf1,Pink1,Zfand2b,Zdhc2,Pnpt1,Gadd45gip1                                               |
| 17_Member  | GO Biological Processes | GO:1903959  | regulation of anion transmembrane transport                  | -2.66986 | -0.22727 | 3/35   | Akt2,Thbs1,Tcaf1                                                                                    |
| 17_Member  | GO Biological Processes | GO:1903533  | regulation of protein targeting                              | -2.1354  | -0.08358 | 3/54   | Akt2,Pink1,Tcaf1                                                                                    |
| 17_Member  | GO Biological Processes | GO:0006612  | protein targeting to membrane                                | -2.1228  | -0.07925 | 4/105  | Akt2,Zfand2b,Zdhc2,Tcaf1                                                                            |
| 17_Member  | GO Biological Processes | GO:0043467  | regulation of generation of precursor metabolites and energy | -2.1228  | -0.07925 | 4/105  | Akt2,Pink1,Pnpt1,Gadd45gip1                                                                         |
| 18_Summary | GO Biological Processes | GO:0010035  | response to inorganic substance                              | -2.65833 | -0.22727 | 10/460 | Camk2b,Nr4a1,Impact,Junb,Jund,Mt1,Thbs1,Slc40a1,Pink1,Kdm6b                                         |
| 18_Member  | GO Biological Processes | GO:0010035  | response to inorganic substance                              | -2.65833 | -0.22727 | 10/460 | Camk2b,Nr4a1,Impact,Junb,Jund,Mt1,Thbs1,Slc40a1,Pink1,Kdm6b                                         |
| 19_Summary | Reactome Gene Sets      | R-MMU-20400 | COPII-mediated vesicle transport                             | -2.64394 | -0.22727 | 4/75   | Bet1,Cd59a,Napb,Ankrd28,Arf5,Man1a2,Akt2,Kif11,Rab4a,Tbc1d1,Dennd1b                                 |
| 19_Member  | Reactome Gene Sets      | R-MMU-20400 | COPII-mediated vesicle transport                             | -2.64394 | -0.22727 | 4/75   | Bet1,Cd59a,Napb,Ankrd28                                                                             |
| 19_Member  | Reactome Gene Sets      | R-MMU-94802 | Transport to the Golgi and subsequent modification           | -2.61476 | -0.22727 | 6/184  | Arf5,Bet1,Cd59a,Man1a2,Napb,Ankrd28                                                                 |
| 19_Member  | Reactome Gene Sets      | R-MMU-19999 | Membrane Trafficking                                         | -2.48559 | -0.19819 | 11/568 | Akt2,Arf5,Bet1,Cd59a,Kif11,Man1a2,Napb,Rab4a,Tbc1d1,Ankrd28,Dennd1b                                 |
| 19_Member  | Reactome Gene Sets      | R-MMU-56536 | Vesicle-mediated transport                                   | -2.28201 | -0.11629 | 11/605 | Akt2,Arf5,Bet1,Cd59a,Kif11,Man1a2,Napb,Rab4a,Tbc1d1,Ankrd28,Dennd1b                                 |
| 19_Member  | Reactome Gene Sets      | R-MMU-19997 | ER to Golgi Anterograde Transport                            | -2.2484  | -0.112   | 5/154  | Arf5,Bet1,Cd59a,Napb,Ankrd28                                                                        |
| 19_Member  | Reactome Gene Sets      | R-MMU-68078 | COPI-mediated anterograde transport                          | -2.243   | -0.112   | 4/97   | Arf5,Bet1,Cd59a,Napb                                                                                |
| 20_Summary | GO Biological Processes | GO:0032479  | regulation of type I interferon production                   | -2.62292 | -0.22727 | 4/76   | Gbp4,Relb,Tlr4,Hmgb2                                                                                |
| 20_Member  | GO Biological Processes | GO:0032479  | regulation of type I interferon production                   | -2.62292 | -0.22727 | 4/76   | Gbp4,Relb,Tlr4,Hmgb2                                                                                |
| 20_Member  | GO Biological Processes | GO:0032606  | type I interferon production                                 | -2.5617  | -0.20985 | 4/79   | Gbp4,Relb,Tlr4,Hmgb2                                                                                |
| 20_Member  | GO Biological Processes | GO:0032648  | regulation of interferon-beta production                     | -2.2284  | -0.10995 | 3/50   | Relb,Tlr4,Hmgb2                                                                                     |
| 20_Member  | GO Biological Processes | GO:0032608  | interferon-beta production                                   | -2.1809  | -0.1003  | 3/52   | Relb,Tlr4,Hmgb2                                                                                     |

*Trem14* promotes inflammatory programs in human and murine macrophages and alters atherosclerosis lesion composition in the Apolipoprotein E deficient mouse

Supplemental table 5- Lesion scores distribution in aortic root leaflets- 16 weeks WD

| Lesion type | Frequency                  |                                                           |
|-------------|----------------------------|-----------------------------------------------------------|
|             | <i>Apoe</i> <sup>-/-</sup> | <i>Apoe</i> <sup>-/-</sup> / <i>Trem14</i> <sup>-/-</sup> |
| III         | 1/30 (3.3%)                | 8/39 (20.5%)                                              |
| IV          | 12/30 (40%)                | 17/39 (43.6%)                                             |
| V           | 10/30 (33.3%)              | 4/39 (10.3%)                                              |
| VI          | 7/30 (23.3%)               | 10/39 (25.6%)                                             |



*Trem14* promotes inflammatory programs in human and murine macrophages and alters atherosclerosis lesion composition in the Apolipoprotein E deficient mouse

**Supplemental table 6- DEG *Apoe*<sup>-/-</sup> /*Trem14*<sup>-/-</sup> oxLDL60 vs. *Apoe*<sup>-/-</sup> oxLDL60**

**Cluster 1**

| <u>gene</u> | <u>Fold change</u> | <u>p-value</u> |
|-------------|--------------------|----------------|
| Sox9        | -19.0257           | 0.00956002     |
| Tmem240     | -12.0326           | 0.0243995      |
| Ect2l       | -11.5275           | 0.00494744     |
| Gm13278     | -10.091            | 0.0302291      |
| Vmn1r32     | -9.88038           | 0.0315939      |
| Fam131b     | -9.65811           | 0.0107308      |
| Ccn5        | -8.94419           | 0.026509       |
| F2rl1       | -8.80283           | 0.0388109      |
| Tenm4       | -8.68859           | 0.0210419      |
| Slc16a8     | -8.33382           | 0.0454222      |
| Hoxc5       | -8.21338           | 0.00669559     |
| Scrn1       | -7.73917           | 0.022394       |
| Tcaf2       | -7.65591           | 0.0203842      |
| Pcdhga3     | -7.55801           | 0.0273524      |
| Henmt1      | -7.30573           | 0.0269455      |
| Gm29686     | -7.30573           | 0.0466291      |
| Calca       | -6.3249            | 0.0273803      |
| Podn        | -5.78885           | 0.0329171      |
| Pde6a       | -5.75288           | 0.00988554     |
| Ush1c       | -5.42889           | 0.0448806      |
| Stfa2l1     | -5.21894           | 0.00120131     |
| Tchh        | -5.20229           | 0.0355136      |
| Nnmt        | -5.13899           | 0.0195096      |
| Slc44a4     | -5.13647           | 0.0346067      |
| Fzd8        | -4.9397            | 0.0291514      |
| Atp1a2      | -4.78641           | 0.0284284      |
| Sp6         | -4.72203           | 0.0488831      |
| Sfrp2       | -4.60666           | 0.0164472      |
| Tmeff2      | -4.58521           | 0.0460576      |
| Gucy1a2     | -4.54504           | 0.0452236      |
| Lrrc74b     | -4.35931           | 0.0235242      |
| Gm48908     | -4.20584           | 0.0287744      |
| Nek11       | -4.18277           | 0.0045785      |
| Mrgpra6     | -4.13774           | 0.0391213      |
| Myl4        | -4.07189           | 0.0191682      |

*Trem14* promotes inflammatory programs in human and murine macrophages and alters atherosclerosis lesion composition in the Apolipoprotein E deficient mouse

|               |          |            |
|---------------|----------|------------|
| Aldh3a1       | -4.02915 | 0.0375738  |
| Rdh9          | -3.95001 | 0.00206341 |
| Hic1          | -3.89035 | 0.0282618  |
| 4930432J09Rik | -3.69485 | 0.0440756  |
| Thsd4         | -3.53802 | 0.0475236  |
| Spdye4b       | -3.39753 | 0.032091   |
| Abhd16b       | -3.29228 | 0.0195396  |
| Dkk2          | -3.20806 | 0.0193172  |
| Ncmap         | -2.9419  | 0.0028391  |
| 4930470G03Rik | -2.91923 | 0.0262223  |
| 4430402I18Rik | -2.79011 | 0.0283828  |
| 4930451G09Rik | -2.6834  | 0.0318638  |
| Lrrc32        | -2.66747 | 0.0488204  |
| Asb5          | -2.66142 | 0.0230051  |
| Tubg2         | -2.64364 | 0.00805588 |
| Cd209f        | -2.64056 | 0.0390906  |
| Rpl39l        | -2.61537 | 3.01E-05   |
| Eps8l1        | -2.60993 | 0.00301783 |
| Pdk4          | -2.57579 | 0.0260786  |
| Itm2a         | -2.52803 | 0.0287467  |
| Slc6a17       | -2.32674 | 0.00191438 |
| Casp12        | -2.30844 | 0.0257566  |
| Rtn4rl1       | -2.28854 | 0.00482121 |
| Slc16a12      | -2.25906 | 0.0316896  |
| 1700028J19Rik | -2.25418 | 0.00772578 |
| Gm14461       | -2.24438 | 0.0227622  |
| Ccdc148       | -2.16815 | 0.0487256  |
| Nsg1          | -2.1005  | 0.0497046  |
| Exoc3l        | -2.08899 | 0.037493   |
| Slit1         | -2.06383 | 0.00409161 |
| Fam174b       | -2.02341 | 0.0251629  |
| Spa17         | -2.01358 | 8.18E-05   |
| Xkrx          | -2.00202 | 0.0192908  |
| Iqcd          | -1.94264 | 0.0344983  |
| Gm5547        | -1.85774 | 0.0459374  |
| Ramp3         | -1.85698 | 0.0352808  |
| Armc2         | -1.82141 | 0.031015   |
| Epdr1         | -1.81922 | 0.0022696  |
| Fgd1          | -1.81775 | 0.0358961  |
| Man2c1os      | -1.8077  | 0.00894556 |
| Stkld1        | -1.79537 | 0.00845022 |

*Trem14* promotes inflammatory programs in human and murine macrophages and alters atherosclerosis lesion composition in the Apolipoprotein E deficient mouse

|               |          |            |
|---------------|----------|------------|
| Zfp385c       | -1.77164 | 0.00200197 |
| Glis2         | -1.74988 | 0.00962954 |
| Fam170b       | -1.74041 | 0.0406194  |
| Gpr68         | -1.73817 | 3.60E-05   |
| Slc18b1       | -1.72793 | 0.036967   |
| Dclk2         | -1.7211  | 0.0460778  |
| C8g           | -1.6899  | 0.0263555  |
| Ednrb         | -1.68952 | 0.00184109 |
| Nxpe5         | -1.68619 | 0.0479868  |
| Entpd4        | -1.68261 | 1.30E-06   |
| Smco3         | -1.67836 | 0.0408975  |
| Epb41l3       | -1.67077 | 0.0297459  |
| Stac2         | -1.67071 | 0.0287905  |
| Gpd1          | -1.65492 | 0.00333926 |
| Ctsg          | -1.64585 | 0.031862   |
| Slc39a12      | -1.6418  | 0.0453547  |
| Rhbdf1        | -1.64051 | 0.0276474  |
| Zfp2          | -1.63378 | 0.00387471 |
| Mmp9          | -1.6244  | 0.0474773  |
| Arhgef5       | -1.62189 | 0.0131353  |
| Triqk         | -1.61653 | 0.0224577  |
| Gpx7          | -1.60341 | 0.0457074  |
| Gm15972       | -1.58775 | 0.0443164  |
| Entpd4b       | -1.5828  | 1.30E-06   |
| Gpx3          | -1.56247 | 0.0201724  |
| Ubr2          | -1.55401 | 0.00342941 |
| Agmo          | -1.54497 | 0.0328485  |
| Fbxo32        | -1.54    | 0.0172469  |
| 2610035D17Rik | -1.5376  | 0.0222783  |
| Tmem151a      | -1.51348 | 0.0454698  |
| Rnase4        | -1.50752 | 1.88E-05   |

## Cluster 2

| gene      | Fold change | p-value    |
|-----------|-------------|------------|
| Tnfrsf10b | 1.50405     | 0.0367875  |
| AI507597  | 1.50648     | 0.00840288 |
| Igflr1    | 1.51741     | 0.00245009 |
| Zfp469    | 1.51852     | 0.016779   |
| Fbxw10    | 1.52091     | 0.0447728  |

*Trem14* promotes inflammatory programs in human and murine macrophages and alters atherosclerosis lesion composition in the Apolipoprotein E deficient mouse

|               |         |             |
|---------------|---------|-------------|
| Tmem25        | 1.52908 | 0.0219922   |
| E330020D12Rik | 1.53261 | 0.0275611   |
| Xk            | 1.53327 | 0.00220164  |
| 2010300C02Rik | 1.53717 | 8.92E-05    |
| H2-Q6         | 1.54091 | 0.0301836   |
| Efhc1         | 1.54631 | 0.0221659   |
| Gdap1l1       | 1.56871 | 0.0153938   |
| Gnat3         | 1.5723  | 0.022864    |
| Plekh2        | 1.58766 | 0.0219467   |
| Nrip3         | 1.59705 | 0.00862041  |
| Gpr35         | 1.59851 | 0.0297579   |
| Olfml3        | 1.60379 | 5.88E-05    |
| Mast4         | 1.61976 | 0.0279317   |
| Osbp2         | 1.62488 | 0.0373613   |
| Trp53cor1     | 1.62586 | 0.0123841   |
| Camsap3       | 1.63069 | 0.00181517  |
| Plekhn1       | 1.63138 | 0.00143611  |
| Gm14853       | 1.63348 | 0.0277613   |
| Malat1        | 1.636   | 0.00954316  |
| Tmem267       | 1.65246 | 0.0337494   |
| H2-Q9         | 1.65399 | 0.0394903   |
| Efr3b         | 1.66126 | 0.018491    |
| 1700003E16Rik | 1.66212 | 0.0405339   |
| Dmc1          | 1.66986 | 0.0291039   |
| 4930565N06Rik | 1.67606 | 0.0496676   |
| Ppm1e         | 1.69011 | 0.0150692   |
| Perm1         | 1.6949  | 1.56E-05    |
| Nptx1         | 1.6966  | 0.00964485  |
| Fads6         | 1.70034 | 0.00807159  |
| Ccdc157       | 1.70188 | 0.000663196 |
| Adra1a        | 1.7059  | 0.0367536   |
| 4931406H21Rik | 1.70653 | 0.0156989   |
| Gm36210       | 1.71543 | 0.0390999   |
| Slc9a4        | 1.71596 | 0.00790945  |
| Ceacam16      | 1.71802 | 0.0183032   |
| B230319C09Rik | 1.71892 | 0.0045253   |
| Nnt           | 1.72399 | 1.82E-08    |
| Pabpc1l       | 1.72815 | 0.0424395   |
| AI450353      | 1.73213 | 0.00741307  |
| Fhod3         | 1.74076 | 3.67E-05    |
| Terc          | 1.74266 | 0.00153114  |

*Trem14* promotes inflammatory programs in human and murine macrophages and alters atherosclerosis lesion composition in the Apolipoprotein E deficient mouse

|               |         |             |
|---------------|---------|-------------|
| Adam4         | 1.7511  | 0.0398783   |
| Mid1          | 1.76798 | 0.000735229 |
| Kcnq1ot1      | 1.7714  | 0.00407486  |
| Pdzd2         | 1.77537 | 0.0329887   |
| Lrrc66        | 1.80141 | 0.00963074  |
| 1810021B22Rik | 1.81136 | 0.0402051   |
| Capn3         | 1.83289 | 0.0345115   |
| Lrrc39        | 1.83384 | 0.0206105   |
| Soat2         | 1.84274 | 0.0466075   |
| Igsf11        | 1.85241 | 1.96E-06    |
| Nnat          | 1.85907 | 0.0404139   |
| Reep1         | 1.86201 | 0.0203235   |
| Plin4         | 1.88574 | 0.0444597   |
| Rhbdl3        | 1.9005  | 0.047935    |
| 9430060I03Rik | 1.90668 | 0.0373071   |
| Pnma1         | 1.91099 | 0.00189594  |
| Insyn2b       | 1.91104 | 0.0281411   |
| Dnd1          | 1.95059 | 0.0018584   |
| Lrp8os2       | 1.97099 | 0.00333875  |
| Fam83g        | 1.97282 | 0.0260282   |
| Ttn           | 1.98755 | 0.0226203   |
| Chic1         | 2.0133  | 0.040843    |
| Pglyrp1       | 2.05455 | 0.00571144  |
| Uchl4         | 2.10913 | 0.0337017   |
| 4632428C04Rik | 2.11197 | 0.0109858   |
| 4930487H11Rik | 2.13    | 0.0016807   |
| Gm4532        | 2.13943 | 0.0253055   |
| Xntrpc        | 2.14412 | 0.0291438   |
| Slc36a2       | 2.18022 | 8.15E-05    |
| Wfikkn2       | 2.1895  | 0.011812    |
| Klkb1         | 2.19702 | 0.00655187  |
| Tcea2         | 2.24736 | 0.00201476  |
| Flrt1         | 2.26512 | 0.0184842   |
| Ppp1r16b      | 2.30717 | 0.0108949   |
| Saxo2         | 2.31345 | 0.0436679   |
| Xlr4a         | 2.31366 | 0.0228822   |
| A530088E08Rik | 2.32513 | 0.0425724   |
| Gm11166       | 2.35552 | 0.0340776   |
| Cited4        | 2.38233 | 0.0448842   |
| Carmil2       | 2.3904  | 0.0197007   |
| Slc1a2        | 2.3965  | 0.016804    |

*Trem14* promotes inflammatory programs in human and murine macrophages and alters atherosclerosis lesion composition in the Apolipoprotein E deficient mouse

|               |         |             |
|---------------|---------|-------------|
| Slc3a1        | 2.43419 | 0.0117796   |
| Slc2a5        | 2.44579 | 0.00756176  |
| Irf6          | 2.47681 | 0.0257976   |
| Nr4a3         | 2.49307 | 0.014655    |
| Gm7854        | 2.49605 | 0.0498046   |
| Fam167a       | 2.52594 | 0.0379082   |
| Lhx2          | 2.53183 | 0.0225248   |
| Hnf1a         | 2.53264 | 0.00515692  |
| 5430402O13Rik | 2.5407  | 0.0107364   |
| Cgn           | 2.58201 | 0.012836    |
| Spred3        | 2.59915 | 0.000615074 |
| Olf111        | 2.61561 | 0.00558798  |
| Hspa1a        | 2.61631 | 0.0230129   |
| Kcnj13        | 2.63553 | 0.023351    |
| Gm38397       | 2.65097 | 0.0020513   |
| Myo1a         | 2.67641 | 0.00822139  |
| Hunk          | 2.67681 | 0.0300051   |
| Gm15713       | 2.71229 | 0.0484685   |
| Gm13031       | 2.74809 | 0.0300936   |
| Gm7334        | 2.77696 | 0.0137552   |
| 4930478L05Rik | 2.80191 | 0.0130466   |
| 9930111H07Rik | 2.82357 | 0.00927893  |
| Bbof1         | 2.87921 | 0.00665063  |
| Sdk2          | 2.92192 | 0.0307977   |
| Gm15446       | 2.95134 | 0.0484946   |
| Serpind1      | 2.95541 | 0.0178172   |
| Ppp1r1a       | 3.06114 | 0.00380936  |
| Cyb5r2        | 3.0851  | 0.00173736  |
| Map9          | 3.11835 | 0.0325554   |
| Tmprss9       | 3.14198 | 0.00328464  |
| Gm21859       | 3.1429  | 0.0247678   |
| Igln5         | 3.15035 | 0.0180769   |
| Diras1        | 3.1549  | 0.0326131   |
| Slc16a4       | 3.17588 | 0.00584256  |
| 6030443J06Rik | 3.22849 | 0.0229823   |
| Arhgap27os3   | 3.25522 | 0.0295234   |
| Mmp28         | 3.26203 | 0.00741331  |
| Aox4          | 3.29142 | 0.0119956   |
| Efcab7        | 3.29277 | 3.87E-05    |
| Gm11517       | 3.30671 | 0.0399405   |
| Lrrn3         | 3.35639 | 0.0271846   |

*Trem14* promotes inflammatory programs in human and murine macrophages and alters atherosclerosis lesion composition in the Apolipoprotein E deficient mouse

|               |         |             |
|---------------|---------|-------------|
| 4933411K16Rik | 3.41873 | 0.0473281   |
| Zfp965        | 3.55844 | 0.0021056   |
| Gm4832        | 3.57939 | 0.0425494   |
| Npm2          | 3.57939 | 0.0366202   |
| Sv2c          | 3.57939 | 0.0437477   |
| Lancl3        | 3.65853 | 0.000985426 |
| Myo5b         | 3.74208 | 0.0379314   |
| Tgfbr3l       | 3.79607 | 0.0239828   |
| Ddx43         | 3.81645 | 0.00688051  |
| Slc2a12       | 3.92608 | 0.0232287   |
| Hoxa2         | 3.97369 | 0.00367299  |
| Oas1h         | 3.97605 | 0.017734    |
| Plin5         | 4.00389 | 0.0469322   |
| Tmem198       | 4.01535 | 0.00875068  |
| Gm16897       | 4.0557  | 0.0224556   |
| G530011O06Rik | 4.05916 | 8.02E-06    |
| Gm12216       | 4.13755 | 0.0233596   |
| Slc46a2       | 4.21917 | 0.0170287   |
| Erdr1         | 4.34903 | 0.000672466 |
| Glyat         | 4.40605 | 0.0282233   |
| Gm7429        | 4.54632 | 0.0165917   |
| Wnt3          | 4.62649 | 0.0458572   |
| Rbakdn        | 4.75658 | 0.0135087   |
| Ak7           | 4.78993 | 0.0215845   |
| Zfp831        | 4.78993 | 0.0273582   |
| Gm21119       | 5.25139 | 0.00843373  |
| 4833415N18Rik | 5.51796 | 0.0339885   |
| Ndufa4l2      | 5.52876 | 0.0345875   |
| Nkpd1         | 5.75276 | 0.0122426   |
| Ccdc169       | 5.99982 | 0.00167315  |
| Scn8a         | 6.0721  | 0.00443709  |
| Cxadr         | 6.15169 | 0.00526935  |
| Enox1         | 6.30689 | 0.043153    |
| 9030404E10Rik | 6.47462 | 4.82E-05    |
| Gm7819        | 6.50716 | 0.00375066  |
| D930015M05Rik | 6.6782  | 0.0110003   |
| Slc40a1       | 6.76466 | 2.51E-10    |
| Prph          | 7.08366 | 0.0311977   |
| Spatc1        | 7.3513  | 0.0361568   |
| Scnn1b        | 7.36159 | 0.000729638 |
| Pip5kl1       | 7.39358 | 0.00582486  |

*Trem1*4 promotes inflammatory programs in human and murine macrophages and alters atherosclerosis lesion composition in the Apolipoprotein E deficient mouse

|               |         |            |
|---------------|---------|------------|
| Usp43         | 8.10693 | 0.0319459  |
| Lrrc2         | 8.28774 | 0.0398942  |
| Pnma2         | 8.29641 | 0.0274442  |
| Gm4651        | 8.47072 | 0.0113025  |
| Amhr2         | 8.50898 | 0.0146087  |
| Cda           | 8.61946 | 0.00126154 |
| Dtx1          | 8.72263 | 0.00668185 |
| Omd           | 9.39605 | 0.00875667 |
| Slc23a3       | 9.60922 | 0.00145792 |
| Snord16a      | 9.69513 | 0.0451337  |
| 43711         | 10.0696 | 0.00185106 |
| Unc93a2       | 10.1708 | 9.44E-07   |
| Ankrd22       | 10.4188 | 0.0395944  |
| 4930447M23Rik | 11.3553 | 0.021801   |
| Mir703        | 11.7884 | 0.00426843 |
| Oxct2a        | 12.9337 | 0.00980232 |
| Disp2         | 13.3811 | 0.013304   |
